# Supplementary material
Source: PubMed Central journal article supplement (PMC9703638)
Supplement: NIHMS1847662-supplement-Supplementary_material.pdf [file NIHMS1847662-supplement-Supplementary_material.pdf]

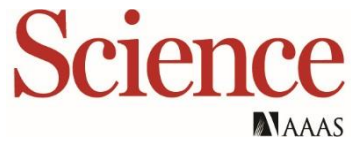

## Supplementary Materials for

### **Dual-polarity voltage imaging of the concurrent dynamics of multiple neuron types**

Madhuvanthi Kannan *et al.*

Corresponding authors: Madhuvanthi Kannan, mkannan@umn.edu; Ganesh Vasani, gvasan@umn.edu; Mark J. Schnitzer, mschnitz@stanford.edu; Vincent A. Pieribone, vincent.pieribone@yale.edu

*Science* **378**, eabm8797 (2022)  
DOI: 10.1126/science.abm8797

#### **The PDF file includes:**

Figs. S1 to S26  
Table S1  
References

#### **Other Supplementary Material for this manuscript includes the following:**

MDAR Reproducibility Checklist

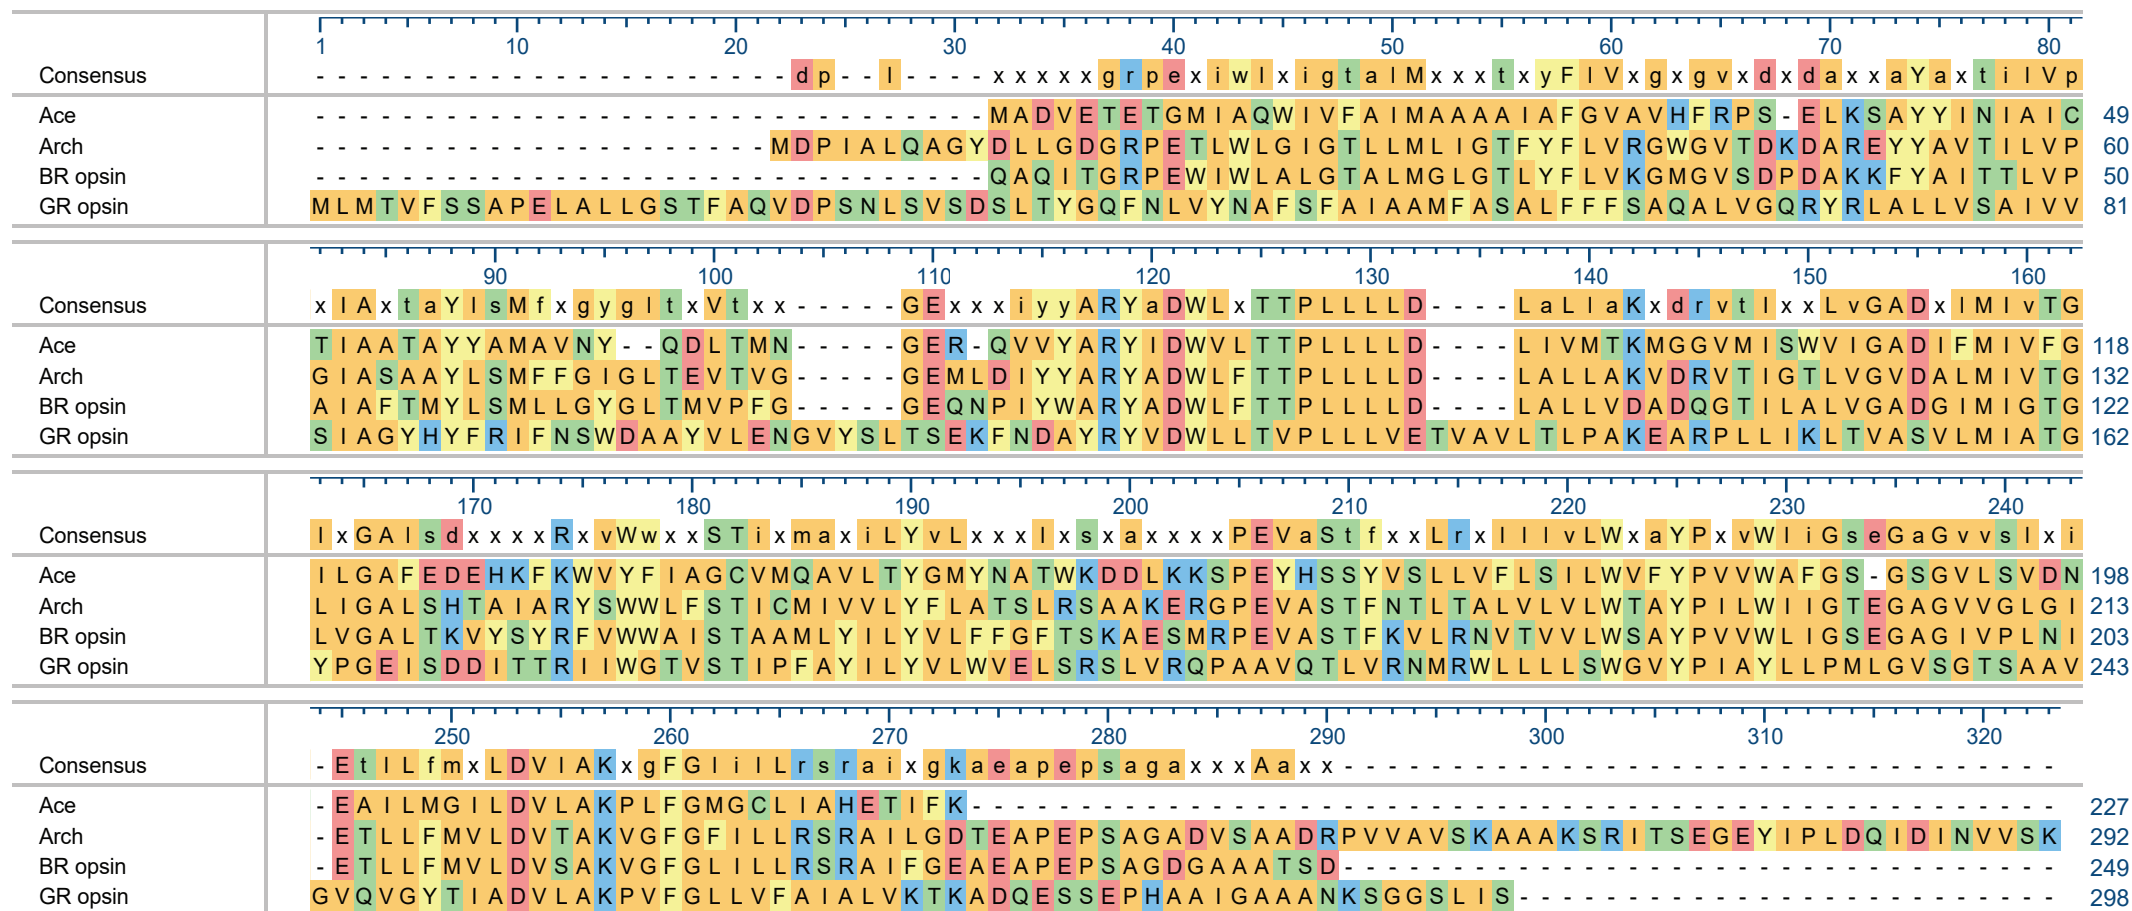

**Figure S1** | Alignment of amino acid sequences of *Acetabularia* rhodopsin II (Ace), Archaerhodopsin (Arch), bacteriorhodopsin (BR) and *Gloeobacter* rhodopsin (GR). Boxes indicate residues targeted for site-directed saturation mutagenesis. AAs are color-coded based on side-chain chemistry. Conserved residues are indicated in upper case.

**A** Ace N81X mutagenesis in Ace-SY-mNeon

|   | 1           | 2          | 3           | 4          | 5          | 6          | 7          | 8          | 9         | 10          | 11          | 12         |
|---|-------------|------------|-------------|------------|------------|------------|------------|------------|-----------|-------------|-------------|------------|
| A | -10<br>N81H | -3<br>N81I | 0<br>N81A   | -4<br>N81L | -2<br>N81P | -4<br>N81P | -3<br>N81N | -4<br>N81P | 0<br>N81I | -5<br>N81N  | -6<br>N81R  | -8<br>N81S |
| B | -3          | -2         | -3          | -8         | -2         | -4         | -8         | -4         | -2        | -12<br>N81A | -10         | -3         |
| C | -7          | 0          | -18<br>N81S | 0          | -11        | -3         | -10        | -10        | -9        | -5          | -14<br>N81S | 0          |
| D | -14<br>N81F | -2         | -16<br>N81S | -8         | -8         | -7         | -11        | -3         | -5        | -11<br>N81S | -6          | Control    |

**B** Ace-FP linker mutagenesis in Ace-mNeon 81S (well C3 from above) (G229X)

|   | 1            | 2            | 3            | 4            | 5   | 6            | 7            | 8   | 9            | 10           | 11  | 12           |
|---|--------------|--------------|--------------|--------------|-----|--------------|--------------|-----|--------------|--------------|-----|--------------|
| A | -25<br>G229G | -16<br>G229P | -13<br>G229E | -14<br>G229P | -15 | -18<br>G229E | -17<br>G229S | -18 | -20<br>G229H | -25<br>G229K | -17 | -16          |
| B | -17          | -15          | -17          | -18<br>G229T | -12 | -15          | -12          | -10 | -21<br>G229F | -12          | -13 | -18          |
| C | -14          | -13          | -10          | -24<br>G229F | -10 | -15          | -11          | -5  | -18<br>G229F | -14          | -16 | -8           |
| D | -16          | -17          | -6           | -12          | -12 | -8           | -9           | -9  | -18<br>G229F | -34<br>G229Y | -5  | -25<br>G229W |

**C** Ace-FP linker mutagenesis in VARNAM  $\Delta$ 229  $\Delta$ 230 (G231X)

|   | 1            | 2            | 3            | 4            | 5            | 6            | 7            | 8            | 9            | 10           | 11           | 12           |
|---|--------------|--------------|--------------|--------------|--------------|--------------|--------------|--------------|--------------|--------------|--------------|--------------|
| A | -17<br>G231S | -26<br>G231I | -14<br>G231D | -22<br>G231T | 0<br>G231Q   | -16<br>G231A | -10<br>G231E | -18<br>G231M | -8<br>G231P  | -19<br>G231K | -16<br>G231A | -16<br>G231S |
| B | -20<br>G231L | -16<br>G231D | -18<br>G231M | -15<br>G231Q | -18<br>G231C | -15<br>G231T | -11<br>G231A | -18<br>G231F | -20<br>G231L | -17<br>G231R | -12<br>G231G | -23<br>G231T |
| C | -16<br>G231S | -21<br>G231K | -8<br>G231P  | -12<br>G231D | -15<br>G231A | -17<br>G231C | -15<br>G231F | -20<br>G231K | -18<br>G231L | -15<br>G231E | -23<br>G231L | -18<br>G231N |
| D | -20<br>G231Q | -20<br>G231K | -17<br>G231M | -18<br>G231L | -17<br>G231S | -16<br>G231W | -17<br>G231F | -19<br>G231F | -18<br>G231M | -15<br>G231G | -16<br>G231E | Control      |

**Figure S2** | High-throughput screening for voltage sensitivity of Ace-mNeon2 and VARNAM.

(A) 48 variants containing saturation mutations at Ace N81 on the backbone of Ace-mNeon were each transfected in electrically excitable HEK cells (30,31) and screened for voltage sensitivity on the high-throughput platform (18). The maximum  $\% \Delta F/F$  obtained for each variant across 4 independent rounds of screening are indicated in each well, together with the sequence information, where available. Color density corresponds to the size of the signal in the negative direction.

(B) Same as (A) for Ace-FP linker mutagenesis on Ace-mNeon 81S backbone.

(C) Same as (A) for Ace-FP linker mutagenesis on VARNAM backbone.

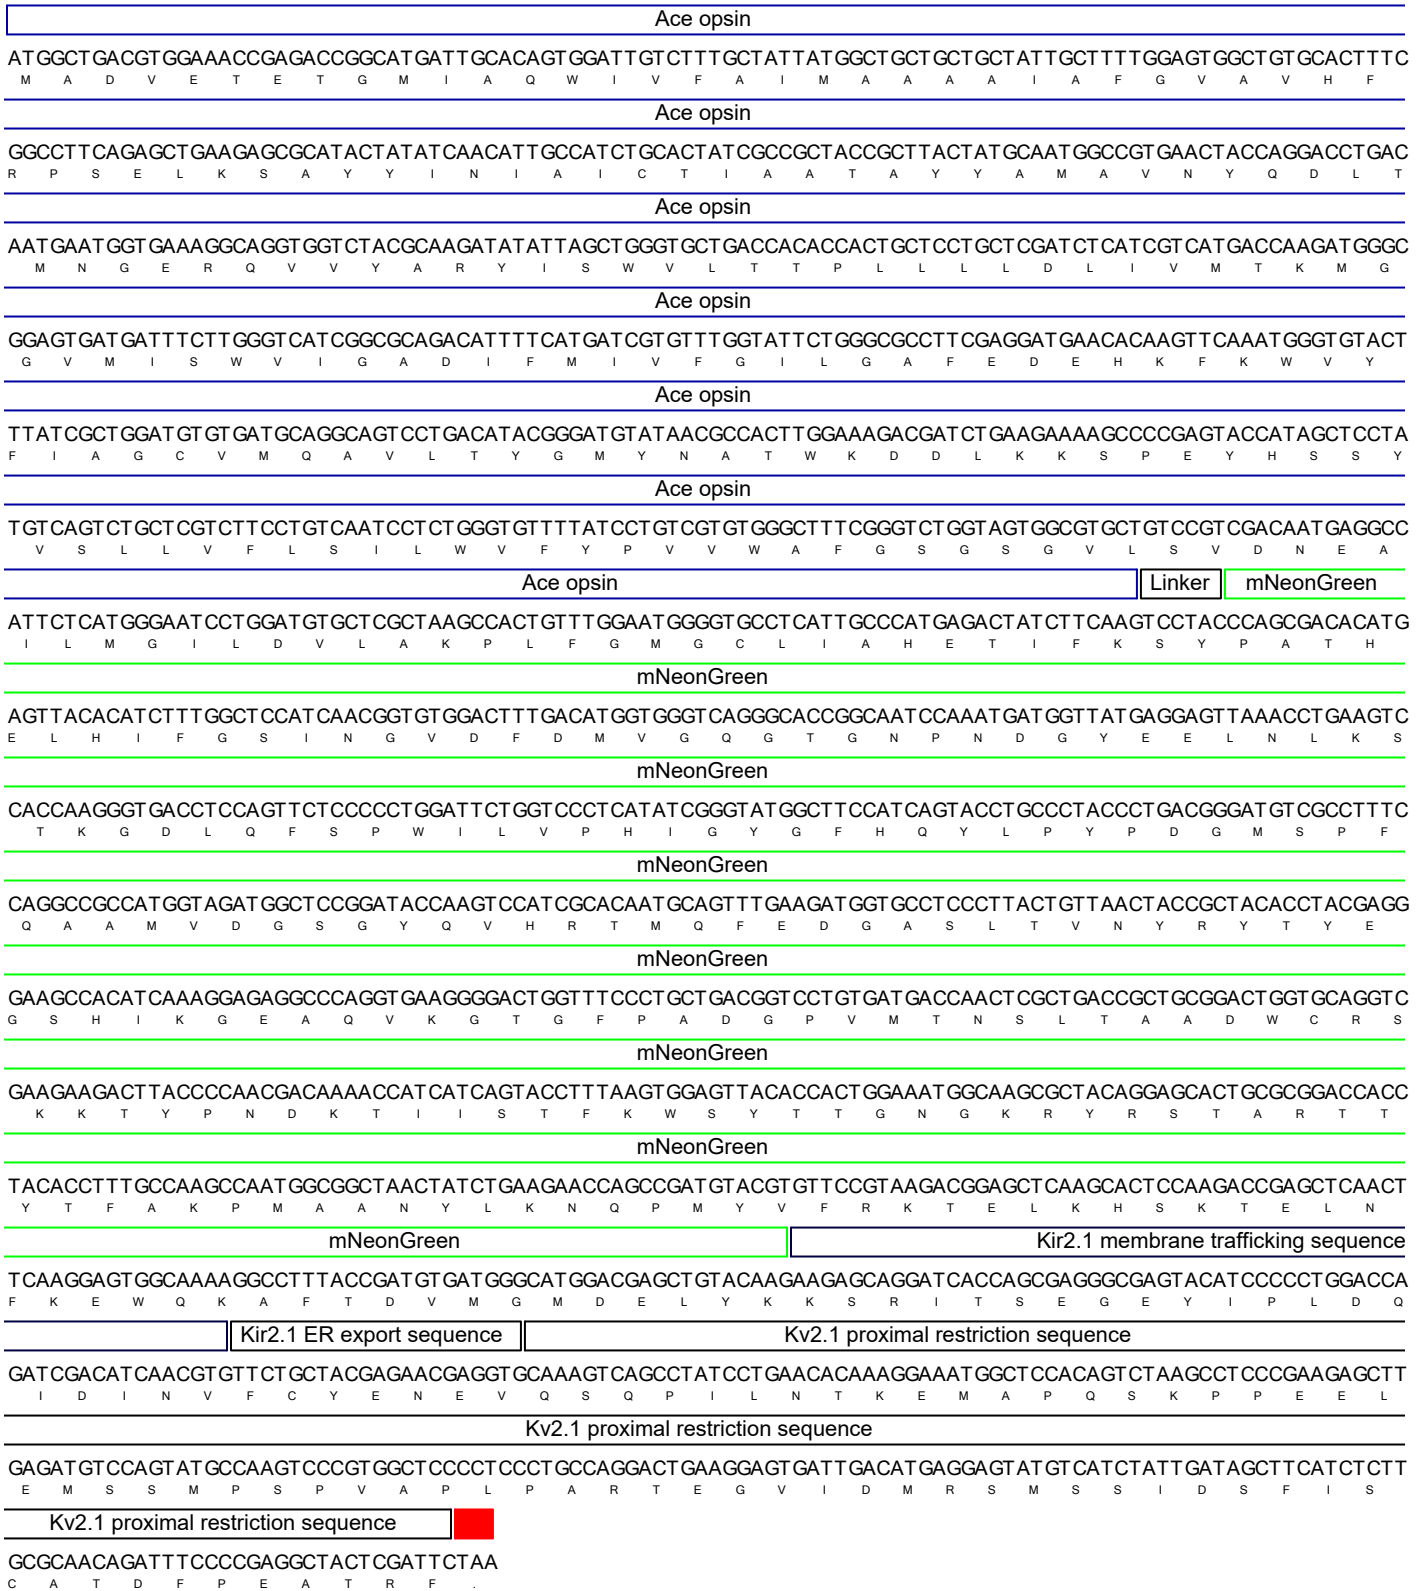

**Figure S3** | DNA and amino acid sequences of Ace-mNeon2 fused to a somatic restriction sequence from Kv2.1.

Ace opsin

ATGGCTGACGTGAAACCGAGACCGCATGATTGCACAGTGGATTGTCTTTGCTATTATGGCTGCTGCTGCTATTGCTTTTGGAGTGGCTGTGCACTTTC  
M A D V E T E T G M I A Q W I V F A I M A A A A I A F G V A V H F

Ace opsin

GGCCTTCAGAGCTGAAGAGCGCATACTATATCAACATTGCCATCTGCACTATCGCCGCTACCGCTTACTATGCAATGGCCGTGAACTACCAGGACCTGAC  
R P S E L K S A Y Y I N I A I C T I A A T A Y Y A M A V N Y Q D L T

Ace opsin

AATGAATGGTGAAAGGCAGGTGGTCTACGCAAGATATATTAGCTGGGTGCTGACCACCACTGCTCCTGCTCGATCTCATCGTCATGACCAAGATGGCC  
M N G E R Q V V Y A R Y I S W V L T T P L L L L D L I V M T K M G

Ace opsin

GGAGTGATGATTTCTTGGGTGATCGGCGCAGACATTTTCATGATCGTGTGGTATTCTGGGCGCCTTCCGAGGATGAACACAAGTTCAAATGGGTGTACT  
G V M I S W V I G A D I F M I V F G I L G A F E D E H K F K W V Y

Ace opsin

TTATCGCTGGATGTGTGATGCAGGCAGTCCTGACATACGGGATGTATAACGCCACTTGAAAGACGATCTGAAGAAAAGCCCGAGTACCATAGCTCCTA  
F I A G C V M Q A V L T Y G M Y N A T W K D D L K K S P E Y H S S Y

Ace opsin

TGTCAGTCTGCTCGTCTTCTGTCAATCCTCTGGGTGTTTTATCCTGTGCTGTGGGCTTTCGGGTCTGGTGTGGCGTGCTGTCCGTGACAAATGAGGCC  
V S L L V F L S I L W V F Y P V V W A F G S G S G V L S V D N E A

Ace opsin

Linker

mRuby3

ATTCTCATGGGAATCCTGGATGTGCTCGCTAAGCCACTGTTTGAATGGGGTGCCTCATTGCCCATGAGACTATCTTCAAGTCCATCCTGATTAAGGAAA  
I L M G I L D V L A K P L F G M G C L I A H E T I F K S I L I K E

mRuby3

ATATCGGGATGAAGGTGCTGATGGAAGGGTCTGTCAATGGCACCAGTCAAAGTGCACCGGAGAGGGAGAGGGCAGGCCATACGAGGGCGTGCAGACAAT  
N M R M K V V M E G S V N G H Q F K C T G E G E G R P Y E G V Q T M

mRuby3

GAGGATCAAAGTGATCGAGGGAGGACCACTGCCTTTCGCCTTTGACATCCTGGCCACCAGCTTTCATGTACGGCAGCAGGACCTTTCATCAAAGTATCCAGCC  
R I K V I E G G P L P F A F D I L A T S F M Y G S R T F I K Y P A

mRuby3

GACATCCCCGATTTCTTTAAGCAGAGCTTCCCCGAGGGCTTTACCTGGGAGAGGGTGACAAAGTACGAGGATGGCGGCGTGGTGAACCGTGACACAGGACA  
D I P D F F K Q S F P E G F T W E R V T R Y E D G G V V T V T Q D

mRuby3

CCTCTCTGGAGGATGGCAGCTGGTGTATAACGTGAAGGTGAGGGGCGTGAACCTCCCTAGCAATGGCCAGTGTGCAGAAGAAGACCAAGGGCTGGGA  
T S L E D G E L V Y N V K V R G V N F P S N G P V M Q K K T K G W E

mRuby3

GCCCAATACAGAGATGATGTACCCTGCAGACGGAGGCCTGAGGGGATATACCGACATCGCCCTGAAGGTGGATGGAGGAGGACACCTGCACTGTAACCTTT  
P N T E M M Y P A D G G L R G Y T D I A L K V D G G G H L H C N F

mRuby3

GTGACCACATACCGCTCCAAGAAGACAGTGGGCAATATCAAGATGCCAGGAGTGCACGCCGTGGACCACAGGCTGGAGCGCATCGAGGAGTCTGATAACG  
V T T Y R S K K T V G N I K M P G V H A V D H R L E R I E E S D N

mRuby3

AGACATATGTGGTGCAGAGAGAGGTGGCCGTGGCCAAGTACTCTAATCTGGCGGCGGGATGGACGAGCTGTATAAGAAGAGCAGGATCACCAGCGAGGG  
E T Y V V Q R E V A V A K Y S N L G G G M D E L Y K K S R I T S E G

Kir2.1 membrane trafficking sequence Kir2.1 ER export sequence Kv2.1 proximal restriction sequence

CGAGTACATCCCCCTGGACCAGATCGACATCAACGTGTTCTGCTACGAGAACGAGGTGCAAAGTCAGCCTATCCTGAACACAAAGGAAATGGCTCCACAG  
E Y I P L D Q I D I N V F C Y E N E V Q S Q P I L N T K E M A P Q

Kv2.1 proximal restriction sequence

TCTAAGCCTCCCGAAGAGCTTGAGATGTCCAGTATGCCAAGTCCCGTGGCTCCCCTCCCTGCCAGGACTGAAGGAGTGATTGACATGAGGAGTATGTGAT  
S K P P E E L E M S S M P S P V A P L P A R T E G V I D M R S M S

Kv2.1 proximal restriction sequence

CTATTGATAGCTTCATCTCTTGCACAACAGATTTCCCCGAGGCTACTCGATTCTAA  
S I D S F I S C A T D F P E A T R F

Figure S4 | DNA and amino acid sequences of VARNAM2 fused to a somatic restriction sequence from Kv2.1.

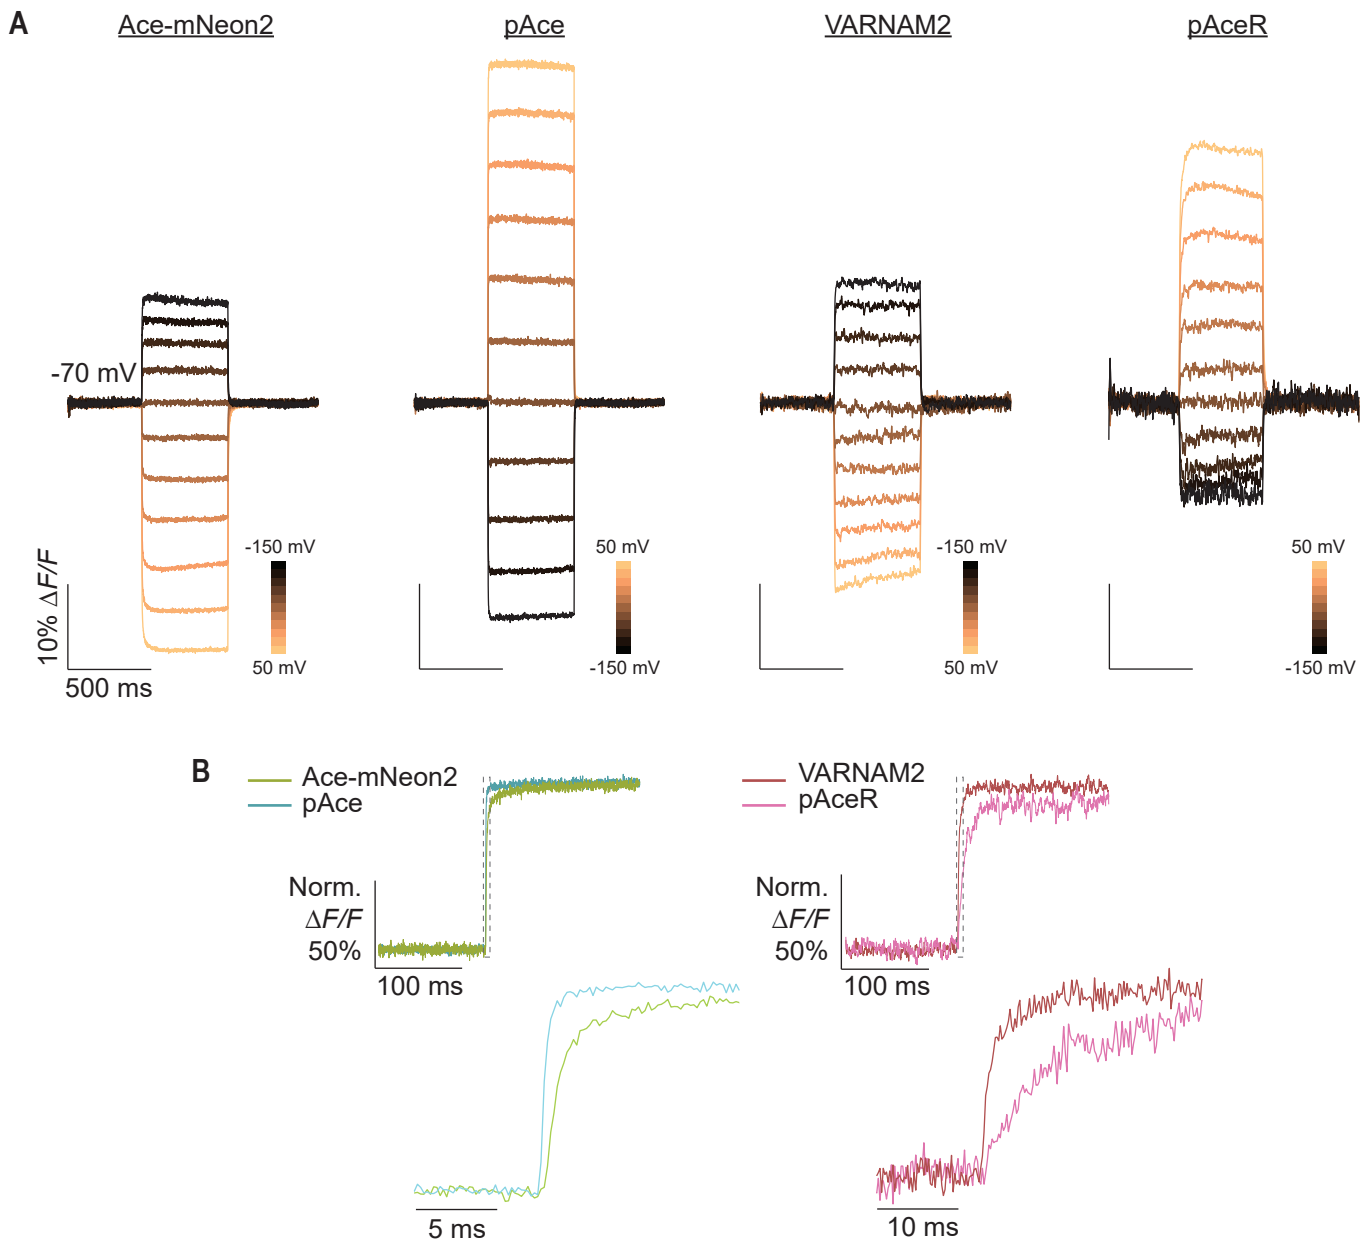

**Figure S5** | Voltage sensitivity and kinetics of the four FRET-opsin indicators in HEK cells. (A) Example fluorescence responses from a HEK cell expressing Ace-mNeon2, pAce, VARNAM2 or pAceR during whole-cell voltage clamp recordings. HEK cells were held at -70 mV and responses were recorded to depolarizing and hyperpolarizing voltage steps at 20 mV increments. (B) Normalized fluorescence responses of HEK cells transfected with Ace-mNeon2 or pAce (*left*), and VARNAM2 or pAceR (*right*) during 120 mV depolarization. Dashed grey box represents interval shown below at an expanded time scale. Imaging conditions: 505 nm LED for Ace-mNeon2 and pAce and 565 nm LED for VARNAM2 and pAceR, 25 mW mm<sup>-2</sup> at sample plane; image acquisition: 1 kHz.

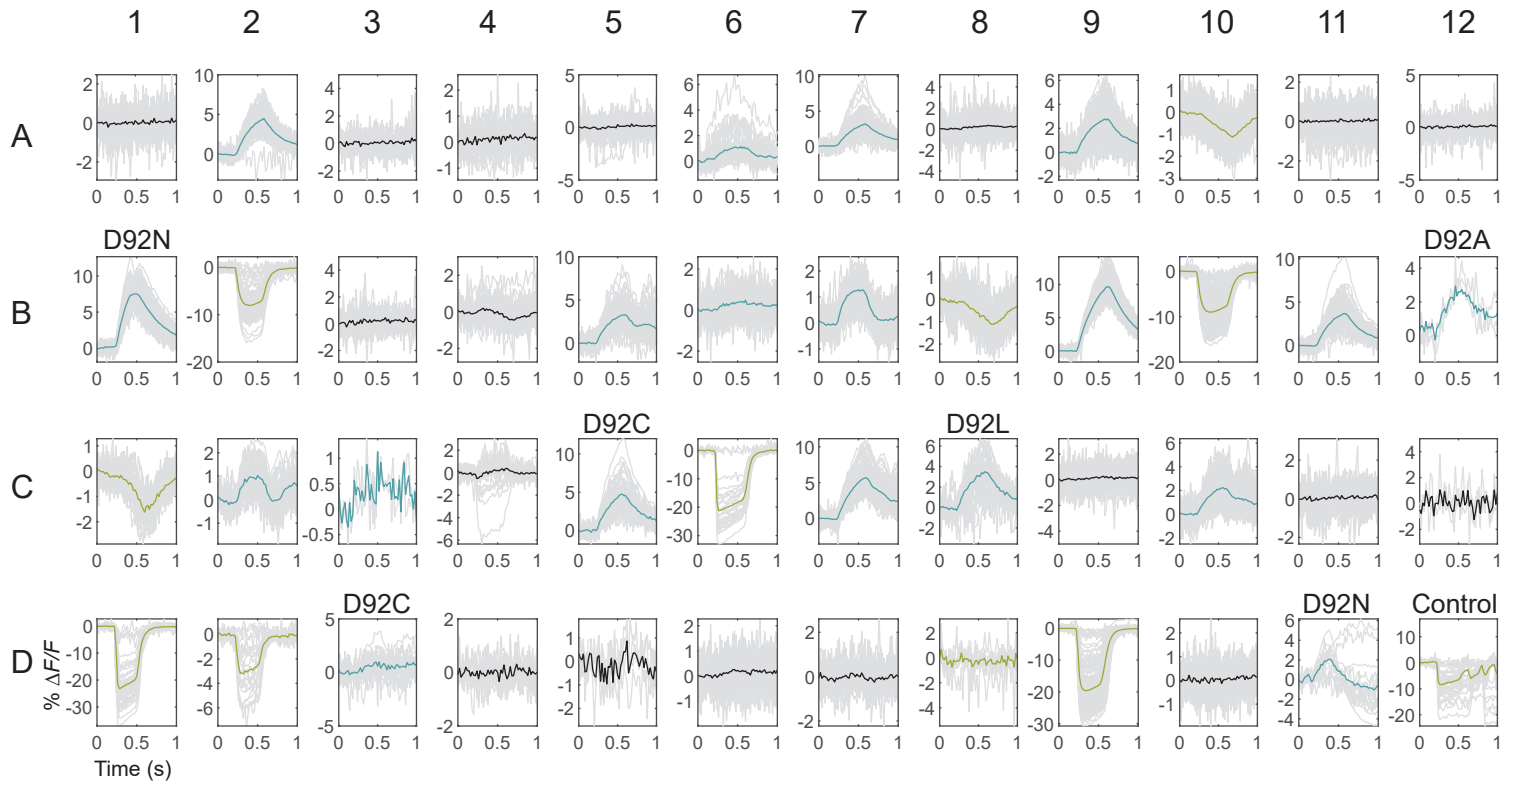

**Figure S6 |** High-throughput voltage screening of Ace-mNeon2 D92X mutants. 48 variants containing saturation mutations at Ace D92 were each transfected in electrically excitable HEK cells (30,31) and screened for voltage sensitivity on the high-throughput platform (18). Shown here are representative fluorescence responses of all cells (grey) from one field-of-view and one round of screening per variant. The average responses to depolarizing field potentials are indicated in blue for positive-polarity, green for negative-polarity and black for non-responding variants. Mutational information is indicated on top of each well for the positive-polarity variants, which were chosen for sequencing post-screening. (n>100 cells/variant).

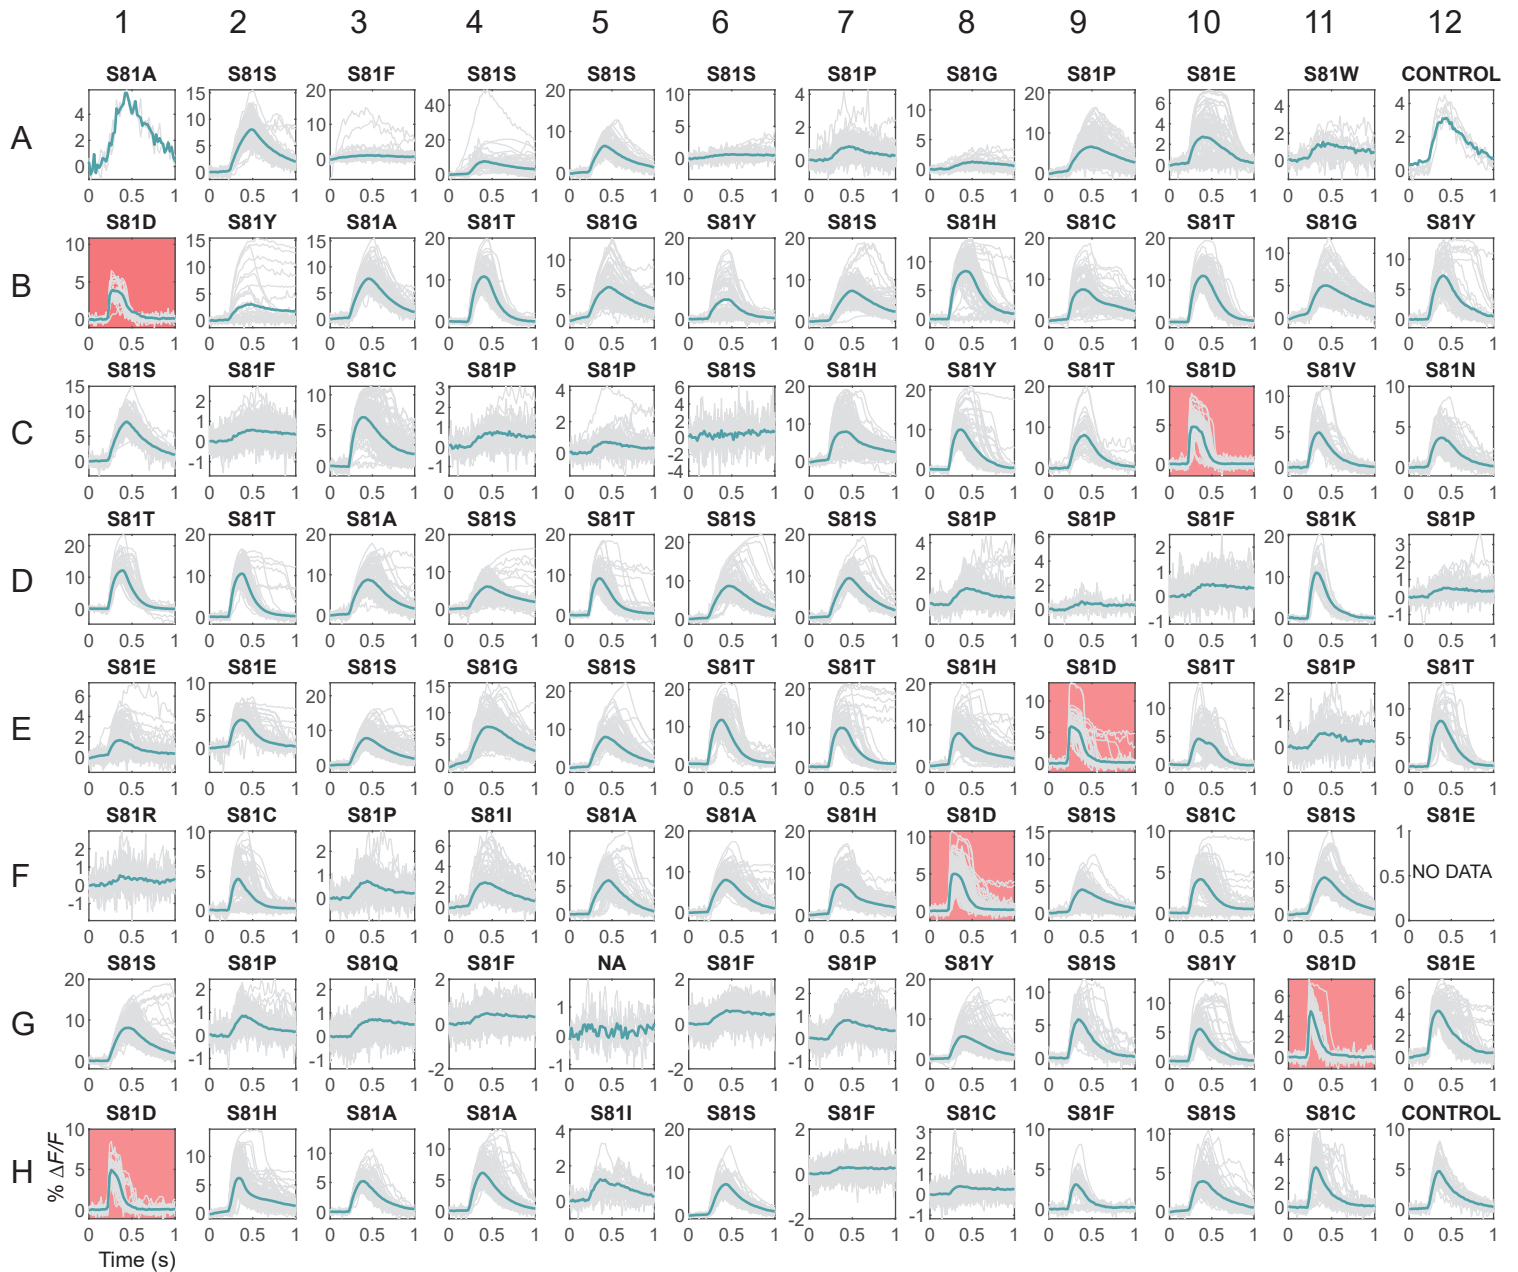

**Figure S7** | High-throughput screening for kinetics rescue mutations in Ace-mNeon2 D92N. 96 variants containing saturation mutations at Ace S81 were each transfected in electrically excitable HEK cells (30,31) and screened for voltage sensitivity and response kinetics on the high-throughput platform (18). Shown here are representative fluorescence responses of all cells (grey) from one field-of-view and one round of screening per variant. The average responses to depolarizing field potentials are indicated in blue. Mutational information is indicated on top of each well ( $n > 100$  cells/variant except A1 and A12, where  $n < 10$  cells/well). Wells shaded in pink exhibited improvements in response kinetics, which is more conspicuous in the maximum response traces. Images were acquired at 200 Hz for this experiment (see Methods).



**A** Ace R78X and W178X on Ace-mNeon2 S81D D92N

|   | 1           | 2           | 3          | 4          | 5           | 6           | 7           | 8            | 9           | 10          | 11          | 12          |
|---|-------------|-------------|------------|------------|-------------|-------------|-------------|--------------|-------------|-------------|-------------|-------------|
| A | 6<br>R78V   | 6<br>R78A   | 8<br>R78F  | 27<br>R78X | 9<br>R78V   | 7<br>R78L   | 27<br>R78C  | 3<br>R78W    | 7<br>R78Q   | 6<br>R78S   | 1<br>R78F   | Control     |
| B | 6<br>R78H   | 13<br>R78M  | 8<br>R78G  | 8<br>R78W  | 6<br>R78Y   | 2<br>R78Y   | 3<br>R78Y   | 10<br>R78M   | 37<br>R78K  | 43<br>R78K  | 6<br>R78V   | 7<br>R78L   |
| C | 8<br>R78R   | 8<br>R78W   | 8<br>R78S  | 10<br>R78R | 0<br>R78W   | 35<br>R78K  | 2<br>R78W   | 3<br>R78A    | 3<br>R78C   | 2<br>R78Y   | 4<br>R78L   | 5<br>R78V   |
| D | 1<br>R78W   | 8<br>R78L   | 8<br>R78G  | 0<br>R78D  | 8<br>R78I   | 2<br>R78Y   | 2<br>R78W   | 7<br>R78R    | 2<br>R78C   | 4<br>R78Y   | 3<br>R78C   | 15<br>R78N  |
| E | 5<br>W178A  | 10<br>W178  | 8<br>W178W | 5<br>W178A | 4<br>W178K  | No data     | 10<br>W178W | 4<br>W178M   | 6<br>W178V  | 8<br>W178G  | 11<br>W178F | 5<br>W178M  |
| F | 7           | 6<br>W178Y  | 6<br>W178S | 5<br>W178A | 8           | 11<br>W178V | 10<br>W178F | 11<br>W178H  | 5<br>W178M  | 8<br>W178W  | 8<br>W178W  | 21<br>W178Q |
| G | 7<br>W178Y  | 4<br>W178I  | 9<br>W178S | 6<br>W178V | 10<br>W178W | 11<br>W178S | 21<br>W178E | 0<br>W178P   | 14<br>W178S | 12<br>W178G | 12<br>W178L | 4<br>W178I  |
| H | 19<br>W178N | 13<br>W178Q | 7<br>W178S | 9<br>W178C | 10<br>W178W | 5<br>W178I  | 6<br>W178F  | 0<br>No data | 5<br>W178T  | 8<br>W178V  | 10<br>W178H | Control     |

**B** Ace W178X on Ace-mNeon2 S81D D92N R78K (well B10 from above)

|   | 1           | 2           | 3           | 4           | 5           | 6           | 7           | 8           | 9            | 10          | 11          | 12          |
|---|-------------|-------------|-------------|-------------|-------------|-------------|-------------|-------------|--------------|-------------|-------------|-------------|
| A | 40<br>W178Y | 11<br>W178Q | 8<br>W178N  | 15<br>W178C | 40<br>W178L | 38<br>W178W | 8<br>W178S  | 40<br>W178W | 0<br>No data | 31<br>W178C | 32<br>W178V | 16<br>W178N |
| B | 39<br>W178Y | 27<br>W178K | 18<br>W178N | 39<br>W178Y | 35<br>W178Y | 24<br>W178K | 32<br>W178I | 23<br>W178G | 40<br>W178Y  | 28<br>W178T | 42<br>W178W | 25<br>W178C |
| C | 0<br>W178R  | 0<br>W178P  | 25<br>W178H | 35<br>W178V | 46<br>W178F | 25<br>W178G | 30<br>W178M | 42<br>W178W | 36<br>W178Y  | 41<br>W178W | 37<br>W178W | 25<br>W178C |
| D | 40<br>W178W | 26<br>W178I | 43<br>W178T | 38<br>W178W | 45<br>W178F | 12<br>W178D | 21<br>W178P | 34<br>W178V | 31<br>W178T  | 40<br>W178V | 46<br>W178C | Control     |

**Figure S8** | High-throughput screening for voltage sensitivity of positive-polarity variant Ace-mNeon2 S81D D92N. (A) 48 variants containing saturation mutations at Ace R78 or W178 on the backbone of Ace-mNeon2 S81D D92N were each transfected in electrically excitable HEK cells (30,31) and screened for voltage sensitivity on the high-throughput platform (18). The maximum  $\% \Delta F/F$  obtained for each variant across 4 independent rounds of screening are indicated in each well together with the sequence information. Color density corresponds to the size of the signal in the positive direction. (B) Same as above for Ace W178X mutagenesis on Ace-mNeon2 S81D D92N R78K backbone.

Ace opsin

ATGGCTGACGTGAAACCGAGACCGGCATGATTGCACAGTGGATTGTCTTTGCTATTATGGCTGCTGCTGCTATTGCTTTTGGAGTGGCTGTGCACTTTC  
M A D V E T E T G M I A Q W I V F A I M A A A A I A F G V A V H F

Ace opsin

GGCCTTCAGAGCTGAAGAGCGCATACTATATCAACATTGCCATCTGCACTATCGCCGCTACCGCTTACTATGCAATGGCCGTGAACTACCAGGACCTGAC  
R P S E L K S A Y Y I N I A I C T I A A T A Y Y A M A V N Y Q D L T

Ace opsin

AATGAATGGTAAAAGGAGGCTGGTCTACGCAAAGTATATTGACTGGGTGCTGACCACACCACTGCTCCTGCTCAACCTCATCGTCATGACCAAGATGGGC  
M N G E R Q V V Y A K Y I D W V L T T P L L L L N L I V M T K M G

Ace opsin

GGAGTGATGATTTCTTGGGTGCTCGGCGCAGACATTTTCATGATCGTGTGGTATTCTGGGCGCCTTCCGAGGATGAACACAAGTCAAATGGGTGACT  
G V M I S W V I G A D I F M I V F G I L G A F E D E H K F K W V Y

Ace opsin

TTATCGCTGGATGTGTGATGCAGGCAGTCTGACATACGGGATGTATAACGCCACTTGAAGAGCGATCTGAAGAAAAGCCCCGAGTACCATAGCTCCTA  
F I A G C V M Q A V L T Y G M Y N A T W K D D L K K S P E Y H S S Y

Ace opsin

TGTCAGTCTGCTCGTCTTCTGTCAATCCTCTTCGTGTTTTATCCTGTGCTGTGGGCTTTCGGGTCTGGTAGTGGCGTGTGTCGTGACAAATGAGGCC  
V S L L V F L S I L F V F Y P V V W A F G S G S G V L S V D N E A

Ace opsin

Linker

mNeonGreen

ATTCTCATGGGAATCCTGGATGTGCTCGCTAAGCCACTGTTTGAATGGGGTGCCTCATTGCCCATGAGACTATCTTCAAGTCTACCCAGCGACACATG  
I L M G I L D V L A K P L F G M G C L I A H E T I F K S Y P A T H

mNeonGreen

AGTTACACATCTTTGGCTCCATCAACGGTGTGGACTTTGACATGGTGGGTGAGGGCACCAGCAATCCAAATGATGGTTATGAGGAGTAAACCTGAAGTC  
E L H I F G S I N G V D F D M V G Q G T G N P N D G Y E E L N L K S

mNeonGreen

CACCAAGGTGACCTCCAGTCTCCCCCTGGATCTGGTCCCTCATATCGGGTATGGCTTCCATCAGTACCTGCCCTACCCTGACGGGATGTCGCCTTTC  
T K G D L Q F S P W I L V P H I G Y G F H Q Y L P Y P D G M S P F

mNeonGreen

CAGGCCGCCATGGTAGATGGCTCCGATACCAAGTCCATCGACAATGAGTGTGAAGATGGTGCCTCCCTTACTGTTAACTACCGCTACACCTACGAGG  
Q A A M V D G S G Y Q V H R T M Q F E D G A S L T V N Y R Y T Y E

mNeonGreen

GAAGCCACATCAAAGGAGAGGCCCAAGTGAAGGGGACTGGTTCCTGCTGACGGTCTGTGATGACCAACTCGCTGACCGCTGCGGACTGGTGCAGGTG  
G S H I K G E A Q V K G T G F P A D G P V M T N S L T A A D W C R S

mNeonGreen

GAAAGAAGACTTACCCCAACGACAAAACCATCATCAGTACCTTTAAGTGGAGTTACACCACTGAAATGGCAAGCGCTACAGGAGCACTGCGCGGACCACC  
K K T Y P N D K T I I S T F K W S Y T T G N G K R Y R S T A R T T

mNeonGreen

TACACCTTTGCCAAGCCAATGGCGGCTAACTATCTGAAGAACCAGCCGATGTACGTGTTCCGTAAAGACGGAGCTCAAGCACTCCAAGACCGAGCTCAACT  
Y T F A K P M A A N Y L K N Q P M Y V F R K T E L K H S K T E L N

mNeonGreen

Kir2.1 membrane trafficking sequence

TCAAGGAGTGGCAAAAGGCCTTTACCGATGTGATGGGCATGGACGAGCTGTACAAGAAGAGCAGGATCACCAAGCGAGGGCGAGTACATCCCCCTGGACCA  
F K E W Q K A F T D V M G M D E L Y K K S R I T S E G E Y I P L D Q

Kir2.1 ER export sequence

Kv2.1 proximal restriction sequence

GATCGACATCAACGTGTTCTGCTACGAGAACGAGGTGCAAAGTCAAGCTATCCTGAACACAAAGGAAATGGCTCCACAGTCTAAGCCTCCCGAAGAGCTT  
I D I N V F C Y E N E V Q S Q P I L N T K E M A P Q S K P P E E L

Kv2.1 proximal restriction sequence

GAGATGTCCAGTATGCCAAGTCCCGTGGCTCCCCTCCCTGCCAGGACTGAAGGAGTGATTGACATGAGGAGTATGTCTATTGATAGCTTCATCTCTT  
E M S S M P S P V A P L P A A R T E G V I D M R S M S S I D S F I S

Kv2.1 proximal restriction sequence

GCGCAACAGATTTCCCCGAGGCTACTCGATTCTAA  
C A T D F P E A T R F

Figure S9 | DNA and amino acid sequences of PACE fused to a somatic restriction sequence from Kv2.1.

Ace opsin

ATGGCTGACGTGAAACCGAGACCGGCATGATTGCACAGTGGATTGTCTTTGCTATTATGGCTGCTGCTGCTATTGCTTTTGGAGTGGCTGTGCACTTTC  
M A D V E T E T G M I A Q W I V F A I M A A A A I A F G V A V H F

Ace opsin

GGCCTTCAGAGCTGAAGAGCGCATACTATATCAACATTGCCATCTGCACTATCGCCGCTACCGCTTACTATGCAATGGCCGTGAACTACCAGGACCTGAC  
R P S E L K S A Y Y I N I A I C T I A A T A Y Y A M A V N Y Q D L T

Ace opsin

AATGAATGGTGAAAGGCAGGTGGTCTACGCAGAGTATATTGACTGGGTGCTGACCACACCACTGCTCCTGCTCAACCTCATCGTCATGACCAAGATGGCC  
M N G E R Q V V Y A E Y I D W V L T T P L L L L N L I V M T K M G

Ace opsin

GGAGTGATGATTTCTTGGGTGATCGCGCAGACATTTTCATGATCGTGTGGTATTCTGGGCGCCTTCCGAGGATGAACACAAGTTCAAATGGGTGTACT  
G V M I S W V I G A D I F M I V F G I L G A F E D E H K F K W V Y

Ace opsin

TTATCGCTGGATGTGTGATGCAGGCAGTCTGACATACGGGATGTATAACGCCACTTGAAAGACGATCTGAAGAAAAGCCCCGAGTACCATAGCTCCTA  
F I A G C V M Q A V L T Y G M Y N A T W K D D L K K S P E Y H S S Y

Ace opsin

TGTCAGTCTGCTCGTCTTCTGTCAATCCTCTGGGTGTTTTATCCTGTGCTGTGGGCTTTCGGGTCTGGTAGTGGCGTGCTGTCCGTGACAAATGAGGCC  
V S L L V F L S I L W V F Y P V V W A F G S G S G V L S V D N E A

Ace opsin

Linker

mRuby3

ATTCTCATGGGAATCCTGGATGTGCTCGCTAAGCCACTGTTTGAATGGGGTGCCTCATTGCCCATGAGACTATCTTCAAGTCCATCCTGATTAAGGAAA  
I L M G I L D V L A K P L F G M G C L I A H E T I F K S I L I K E

mRuby3

ATATCGGGATGAAGGTGCTGATGGAAGGGTCTGTCAATGGCACCAGTCAAAGTGCACCGGAGAGGGAGAGGGCAGGCCATACGAGGGCGTGACAGCAAT  
N M R M K V V M E G S V N G H Q F K C T G E G E G R P Y E G V Q T M

mRuby3

GAGGATCAAAGTGATCGAGGGAGGACCACTGCCTTTCGCCTTTGACATCCTGGCCACCAGCTTCAATGTACGGCAGCAGGACCTTCAAGTATCCAGCC  
R I K V I E G G P L P F A F D I L A T S F M Y G S R T F I K Y P A

mRuby3

GACATCCCCGATTTCTTTAAGCAGAGCTTCCCCGAGGGCTTTACCTGGGAGAGGGTGACAAAGTACGAGGATGGCGGCGTGGTGACCGTGACACAGGACA  
D I P D F F K Q S F P E G F T W E R V T R Y E D G G V V T V T Q D

mRuby3

CCTCTCTGGAGGATGGCAGCTGGTGTATAACGTGAAGGTGAGGGGCGTGAAGTTCCTTAGCAATGGCCAGTGTGACAGAAAGACCAAGGGCTGGGA  
T S L E D G E L V Y N V K V R G V N F P S N G P V M Q K K T K G W E

mRuby3

GCCCAATACAGAGATGATGTACCCTGACAGCAGGAGGCCTGAGGGGATATACCGACATCGCCCTGAAGGTGGATGGAGGAGGACACCTGCACTGTAACCTTT  
P N T E M M Y P A D G G L R G Y T D I A L K V D G G G H L H C N F

mRuby3

GTGACCACATACCGCTCCAAGAAGACAGTGGGCAATATCAAGATGCCAGGAGTGCACGCCGTGGACCACAGGCTGGAGCGCATCGAGGAGTCTGATAACG  
V T T Y R S K K T V G N I K M P G V H A V D H R L E R I E E S D N

mRuby3

AGACATATGTGGTGCAGAGAGAGGTGGCCGTGGCCAAGTACTCTAATCTGGCGGCGGGATGGACGAGCTGTATAAGAAGAGCAGGATCACCAGCGAGGG  
E T Y V V Q R E V A V A K Y S N L G G G M D E L Y K K S R I T S E G

CGAGTACATCCCCCTGGACCAGATCGACATCAACGTGTTCTGCTACGAGAACGAGGTGCAAAGTCAGCCTATCCTGAACACAAAGGAAATGGCTCCACAG  
E Y I P L D Q I D I N V F C Y E N E V Q S Q P I L N T K E M A P Q

Kv2.1 proximal restriction sequence

TCTAAGCCTCCCGAAGAGCTTGAGATGTCCAGTATGCCAAGTCCCGTGGCTCCCCTCCCTGCCAGGACTGAAGGAGTGATTGACATGAGGAGTATGTGAT  
S K P P E E L E M S S M P S P V A P L P A R T E G V I D M R S M S

Kv2.1 proximal restriction sequence

CTATTGATAGCTTCATCTCTTGCGCAACAGATTTCCCCGAGGCTACTCGATTCTAA  
S I D S F I S C A T D F P E A T R F .

Figure S10 | DNA and amino acid sequences of PACER fused to a somatic restriction sequence from Kv2.1.

**A**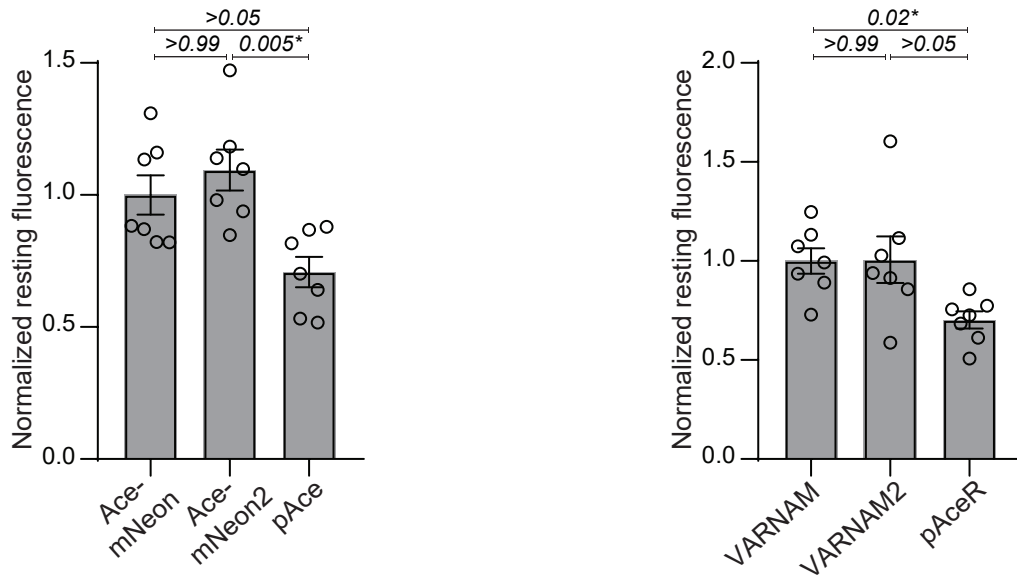**B**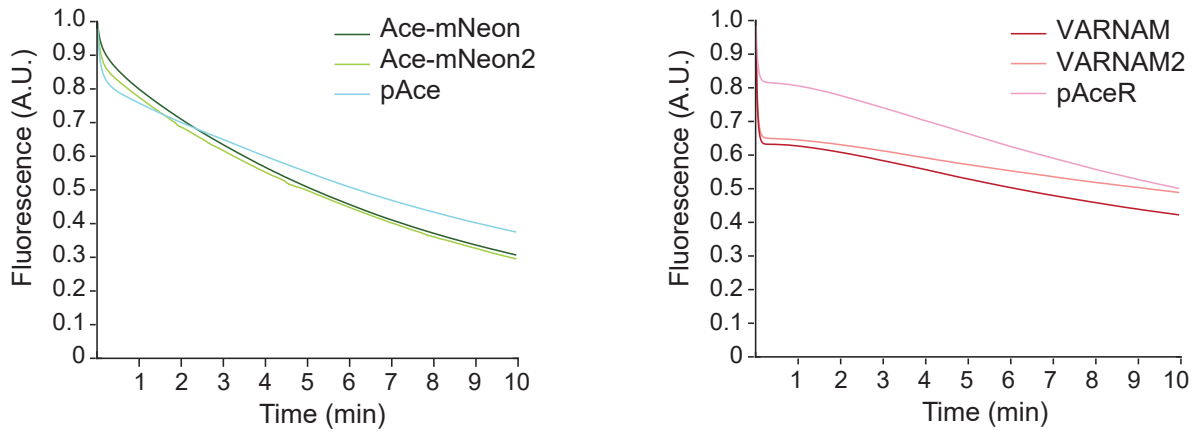

**Figure S11** | Brightness and photobleaching characteristics of the FRET-opsin indicators.

(A) *Left*, Resting fluorescence of Ace-mNeon, Ace-mNeon2 and pAce normalized to average resting intensity of Ace-mNeon. Values represent mean  $\pm$  S.E.M. P values are italicized. Statistical comparisons were made across all conditions. Asterisks denote significance (Kruskal-Wallis test with Dunn's multiple comparisons correction). *Right*, same as above for VARNAM, VARNAM2 and pAceR (n=7 wells/condition, ~500 cells/well).

(B) Photobleaching profiles of Ace-mNeon, Ace-mNeon2 and pAce (*left*) and VARNAM, VARNAM2 and pAceR (*right*) in HEK cells under continuous illumination (n=4 wells each, ~100 cells/well) Imaging conditions: 505 nm LED for the green indicators and 565 nm LED for the red indicators, 25 mW mm<sup>-2</sup> at sample plane.

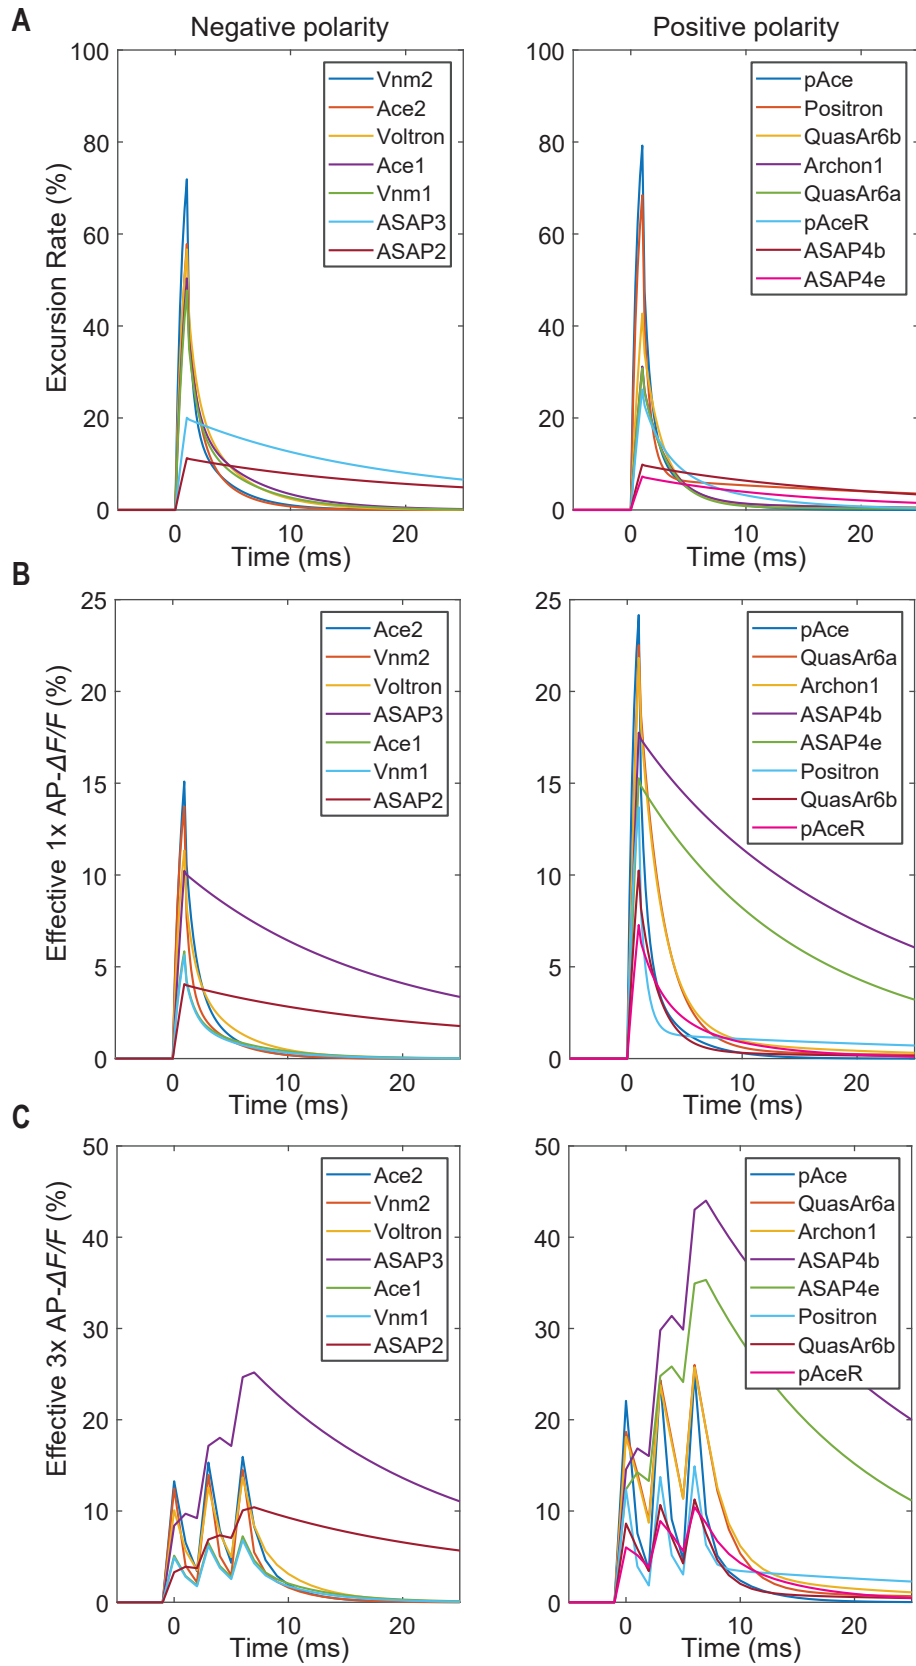

**Figure S12** | Benchmarking GEVIs based on their 1 ms impulse responses calculated using reported values of intrinsic response kinetics (see Methods).

(A) Excursion rate, defined as the effective amplitude of the saturated  $\Delta F/F$ , for negative and positive polarity GEVIs. GEVIs are ranked in decreasing order of peak saturated  $\Delta F/F$ . Sampling rate: 5 kHz.

(B) Effective  $\Delta F/F$  for 1x AP. Sampling rate: 5 kHz.

(C) Effective  $\Delta F/F$  for 3x AP spike burst, 3 ms refractory period. Sampling rate: 1 kHz.

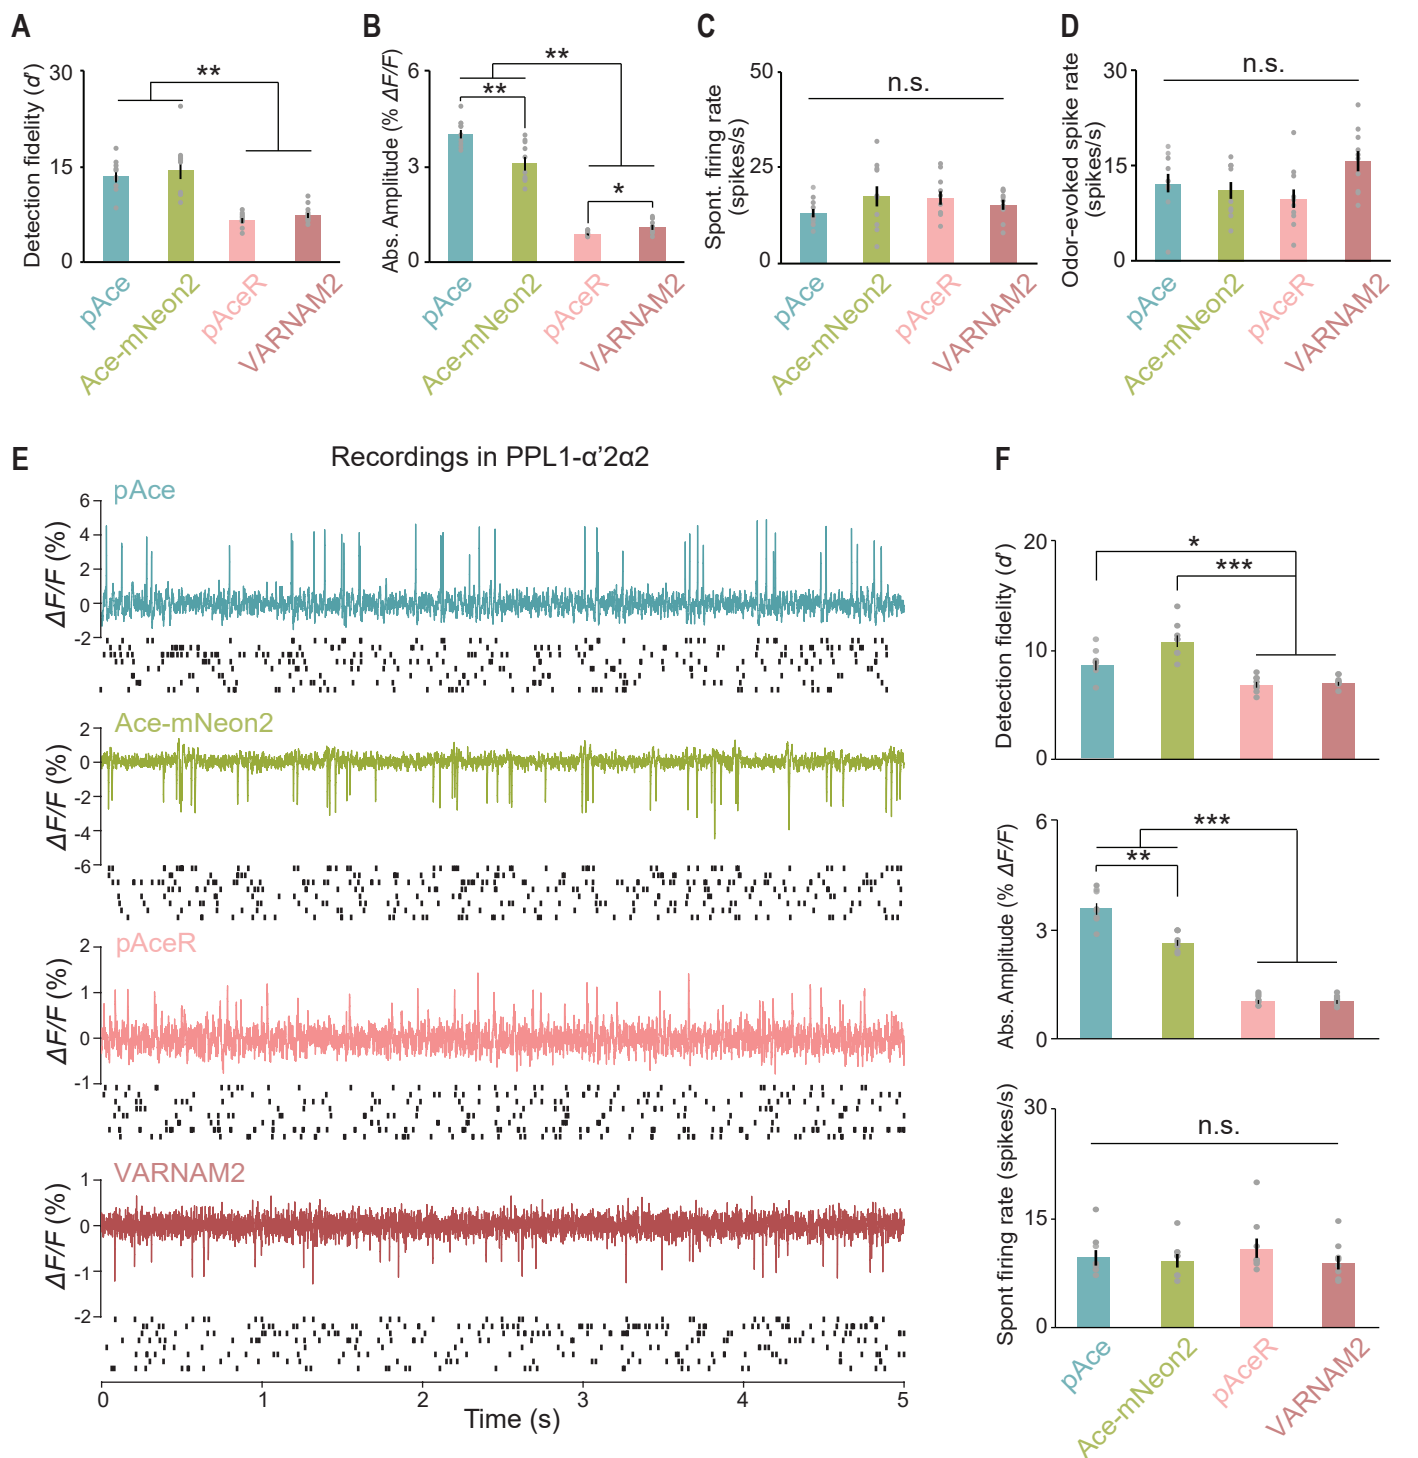

**Figure S13** | Characterization of the FRET-opsin indicators in PPL1- $\gamma2\alpha'1$  and PPL1- $\alpha'2\alpha2$  neurons in *Drosophila*. (A-D) Comparisons of (A) spike detection fidelities (B) absolute amplitudes (C) mean spontaneous firing rates, and (D) odor-evoked firing rate change obtained from recordings in PPL1- $\gamma2\alpha'1$  expressing each of the four indicators. (n = 10 trials; 2 trials per fly; \* $P < 0.05$ , \*\* $P < 0.01$ , \*\*\* $P < 0.001$ , n.s.=not significant, Kruskal-Wallis ANOVA and post-hoc Mann-Whitney U-tests with Holm-Bonferroni correction). (E) Representative optical recordings (*top*) and raster plots (*bottom*) of 5-s spontaneous spiking in a PPL1- $\alpha'2\alpha2$  neuron expressing pAce, Ace-mNeon2, pAceR or VARNAM2 (n = 8 trials; 2 trials per fly). (F) Comparisons of detection fidelities (*top*), absolute amplitudes (*center*), and mean spontaneous firing rates (*bottom*) in PPL1- $\alpha'2\alpha2$  neurons. (n = 8 trials; 2 trials per fly; \* $P < 0.05$ , \*\* $P < 0.01$ , \*\*\* $P < 0.001$ , Kruskal-Wallis ANOVA and post-hoc Mann-Whitney U-tests with Holm-Bonferroni correction).

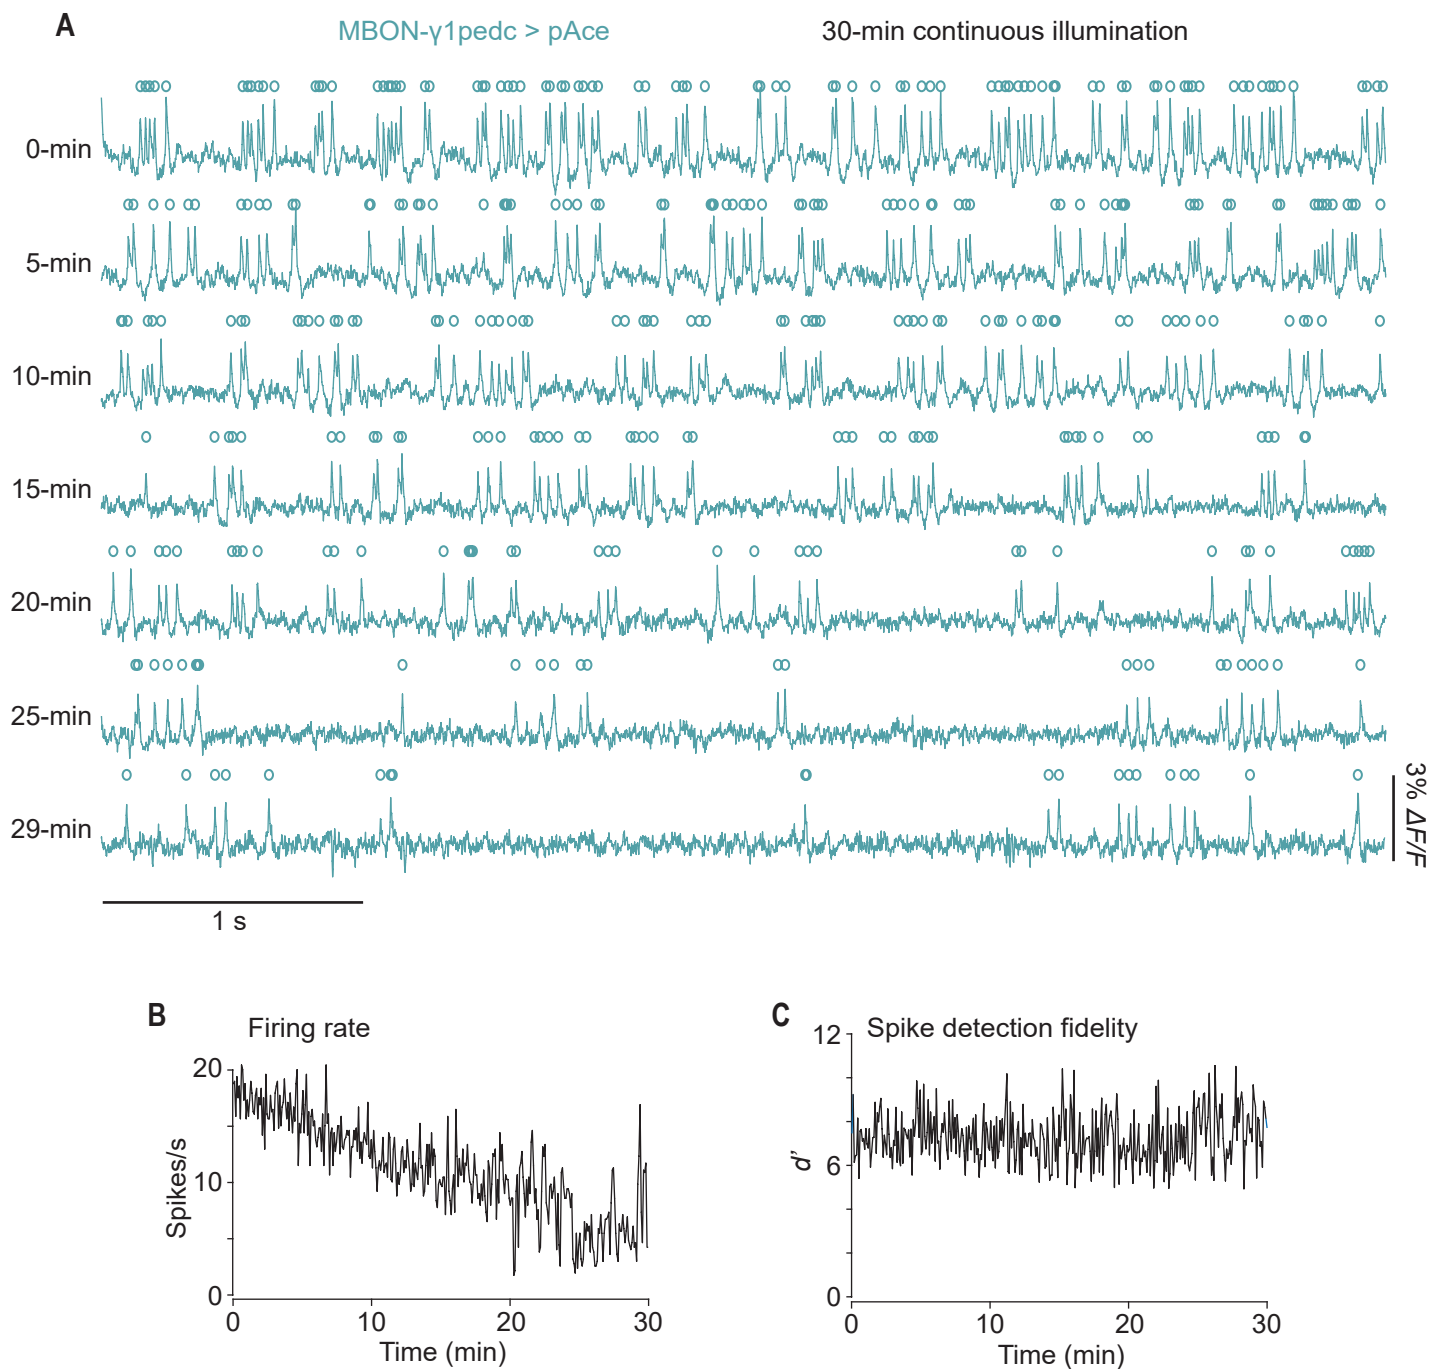

**Figure S14** | 30-min continuous imaging using pAce in *Drosophila*.

(A) Example 5 s recordings collected at regular time intervals during 30-min continuous illumination showing spontaneous spiking in a MBON- $\gamma$ 1pedc>a/ $\beta$  neuron expressing pAce.

(B) Time-varying spike rate in the recorded MBON- $\gamma$ 1pedc>a/ $\beta$  neuron during the 30-min imaging session.

(C) Spike detection fidelity in the recorded MBON- $\gamma$ 1pedc>a/ $\beta$  neuron during the 30-min imaging session.

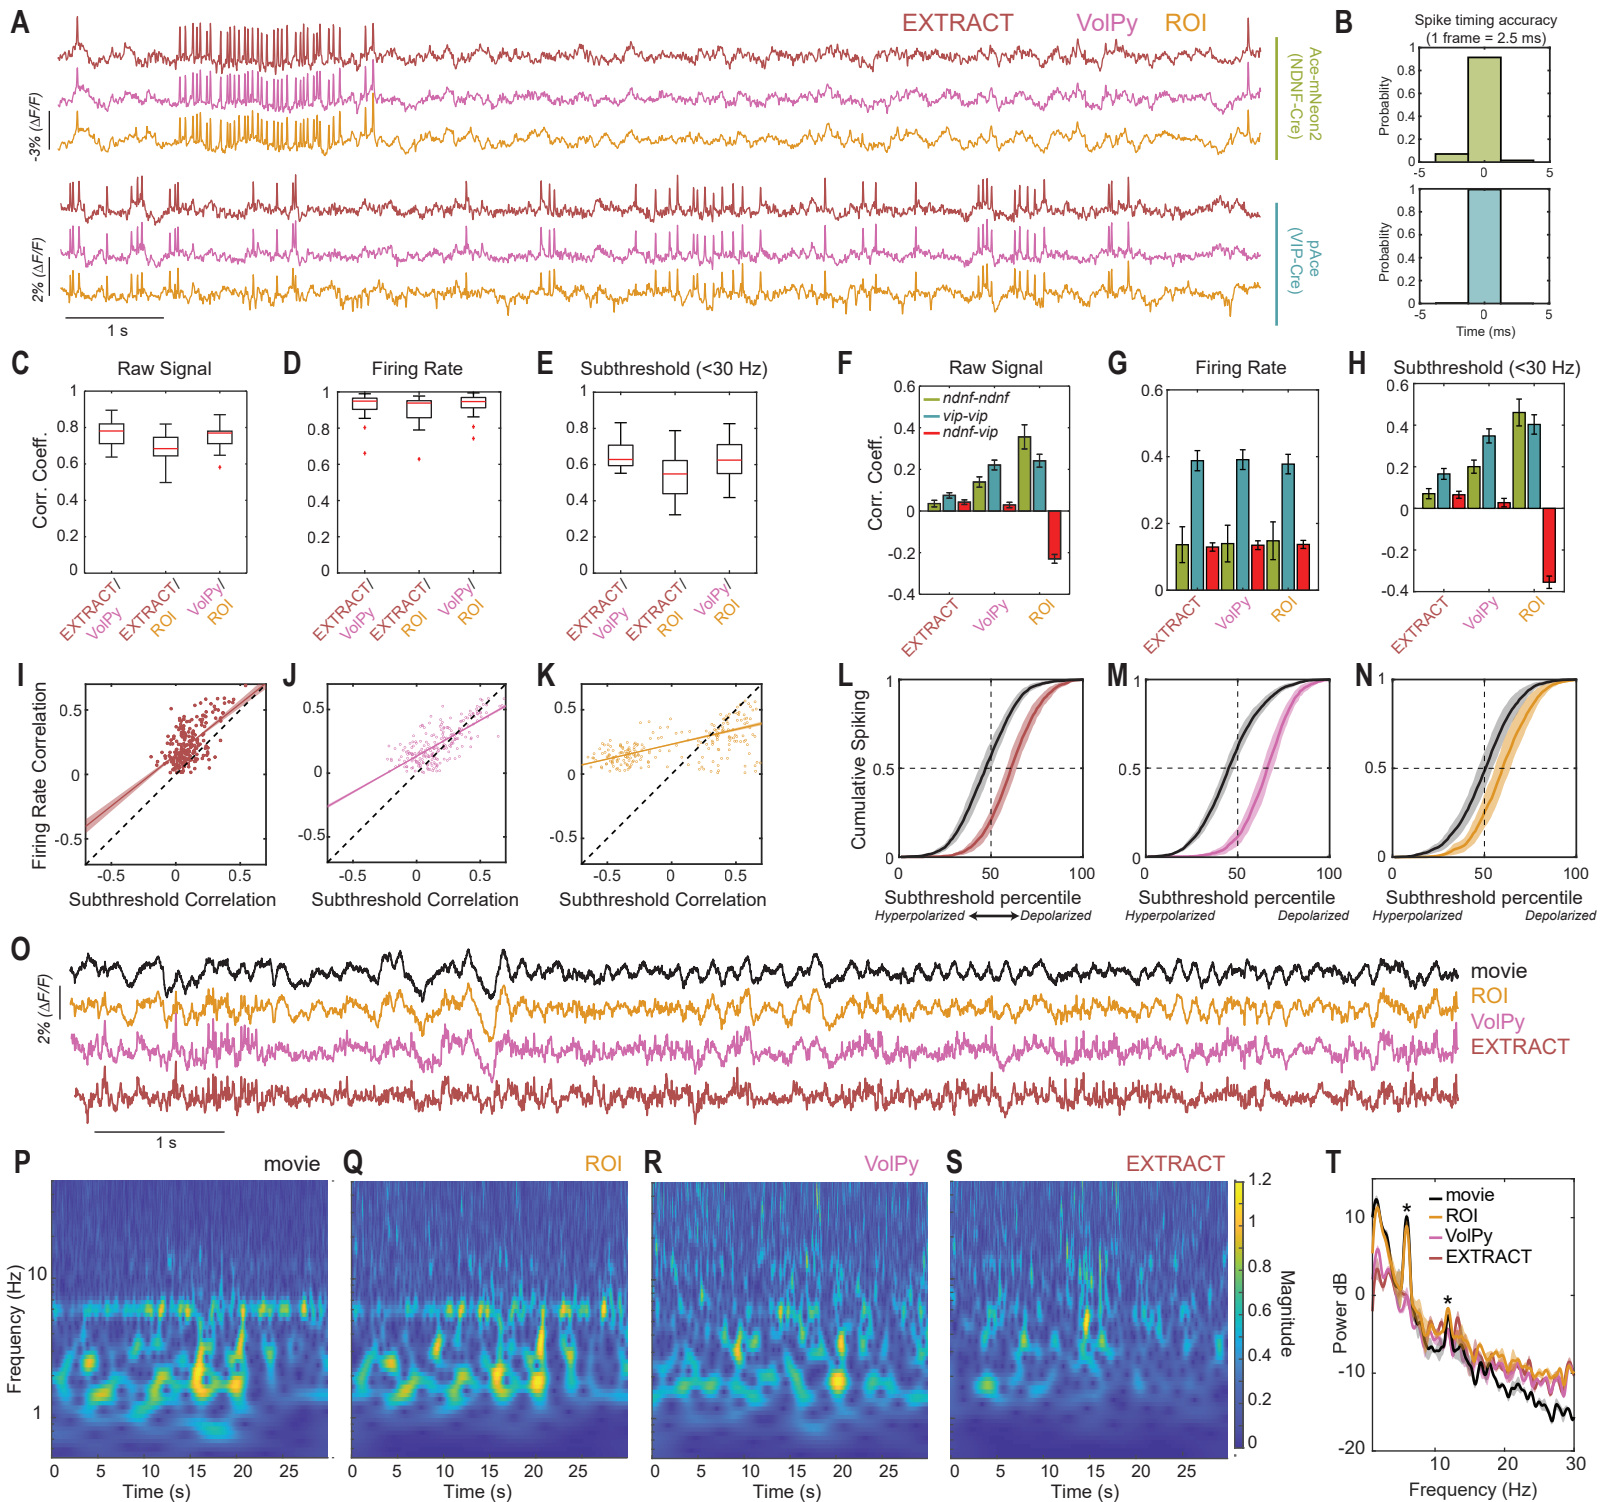

**Figure S15 | Benchmarking of VoIPy and EXTRACT algorithms against ROI-based cell segmentation.**

(A): Example time-traces estimated using ROI segmentation (yellow), VoIPy (purple), or EXTRACT (red) for NDNF- and VIP-neurons labelled with Ace-mNeon2 or pAce, respectively (data from Fig. 3C). Note the excess spiking cross-talk on the ROI traces.

(B): Spike timing accuracy between spikes detected on EXTRACT versus VoIPy traces. (C-E): Box plots of cross-correlation coefficients between each pair of extraction methods for (C) raw signals, (D) firing rate signals, and (E) subthreshold signals.

(F-H): Pairwise correlation coefficients within and between NDNF/VIP populations, across all three extraction methods for (F) raw signals, (G) firing rate signals, and (H) subthreshold signals. Note that all three methods provide identical firing rate correlations whereas the ROI-method strongly overestimates subthreshold cross-correlation, likely due to excess hemodynamic artifacts. Data represented as mean  $\pm$  95% CI. (I-K): Effect of the subthreshold input dynamics on the spiking output dynamics between pairs of neurons, whose time-traces are estimated using (I) EXTRACT, (J) VoIPy, or (K) ROI. Circles represent each pair of neurons. The dash line is the first bisector. Note that pairs of neurons with shared subthreshold synaptic inputs tend to fire together.

(L-N): (L) EXTRACT, (M) VoIPy, or (N) ROI captures the increased spiking likelihood during subthreshold depolarization (Data: mean  $\pm$  99% CI).

(O): Time-series corresponding to temporal averaging of the processed movie pixels (black) and temporal averaging of all neurons' time traces estimated by each extraction method.

(P-S): Wavelet spectrograms of every time series in (D), showing strong spectral content overlap between (P) movie average and (Q) ROI but not with (R) VoIPy or (S) EXTRACT.

(T): Power spectrum density of (D), showing that VoIPy and EXTRACT, but not ROI-based, are immune to correlated background fluctuations (\*: heartbeat fundamental frequency at  $\sim$ 6 Hz and its first harmonics  $\sim$ 12 Hz).



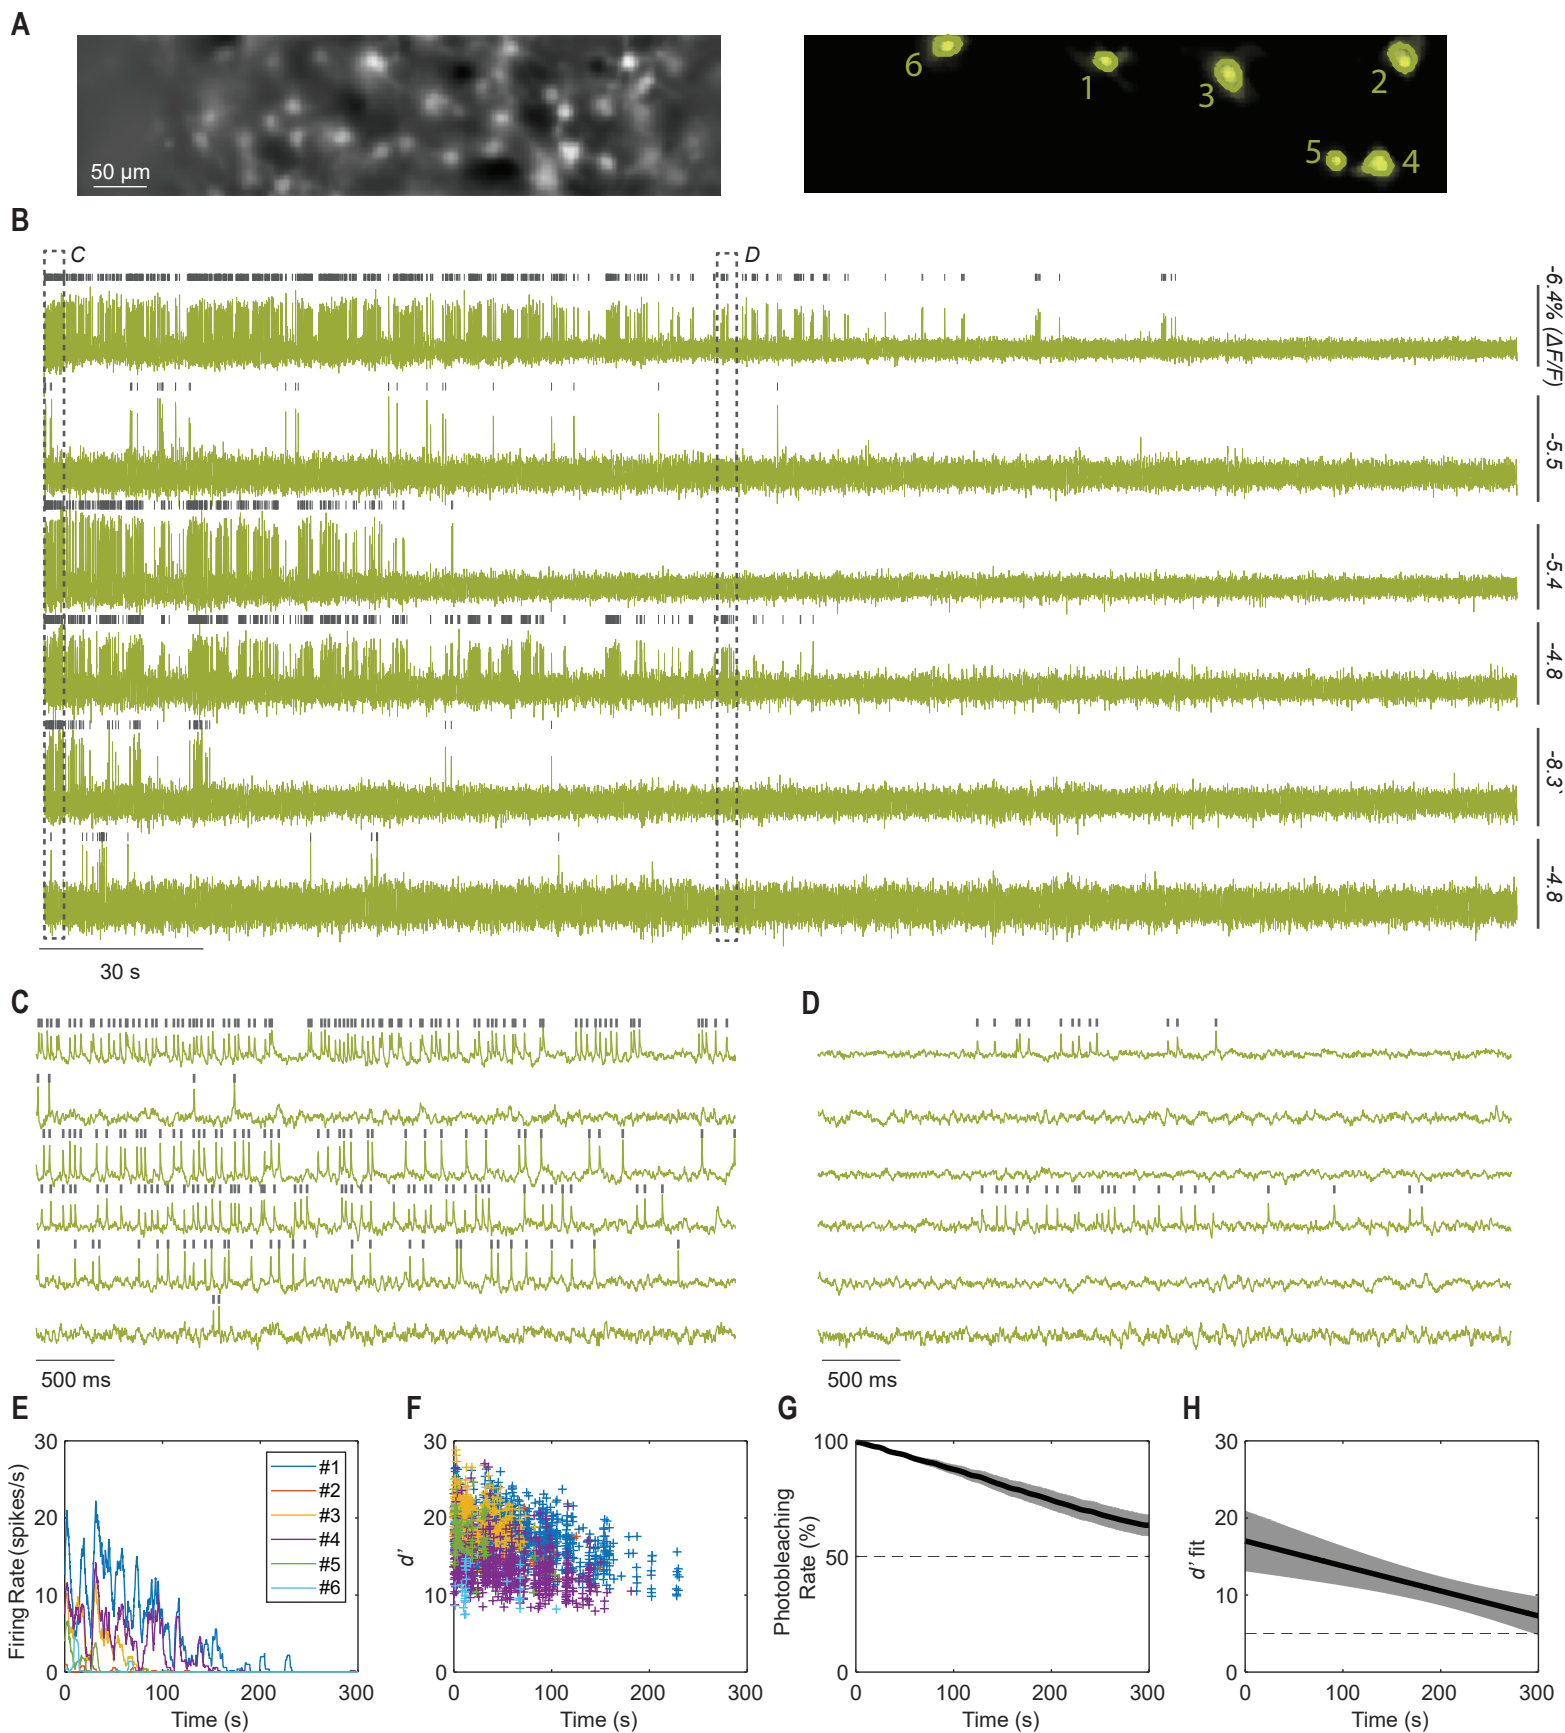

**Figure S16** | 5 min-long *in vivo* spike imaging using Ace-mNeon2 in awake mouse.

(A) *Left*, Representative raw epifluorescence image and *right*, spatial footprints of Ace-mNeon2 signals from 6 identified V1 NDNF interneurons.

(B-D)  $\Delta F/F$  traces for all neurons in (A). Dashed boxes are expanded in (C-D).

(E) Time course of firing rate for all neurons in (B).

(F) Time course of spike detection metric  $d'$  for all neurons in (B).

(G) Average photobleaching rate across all neurons in (B).

(H) Average of the  $d'$  values for all neurons in (F).

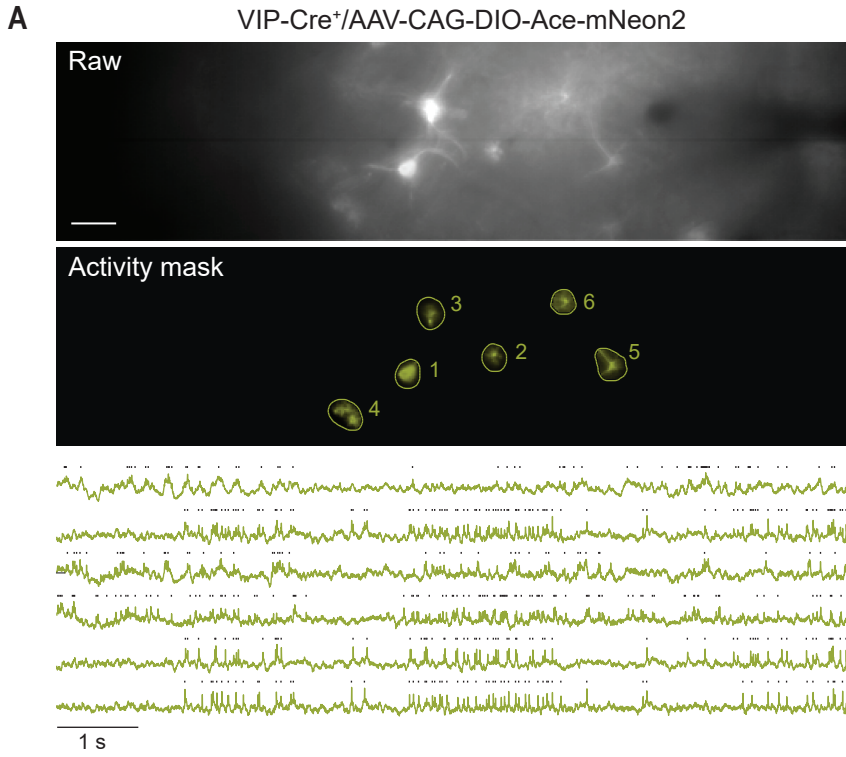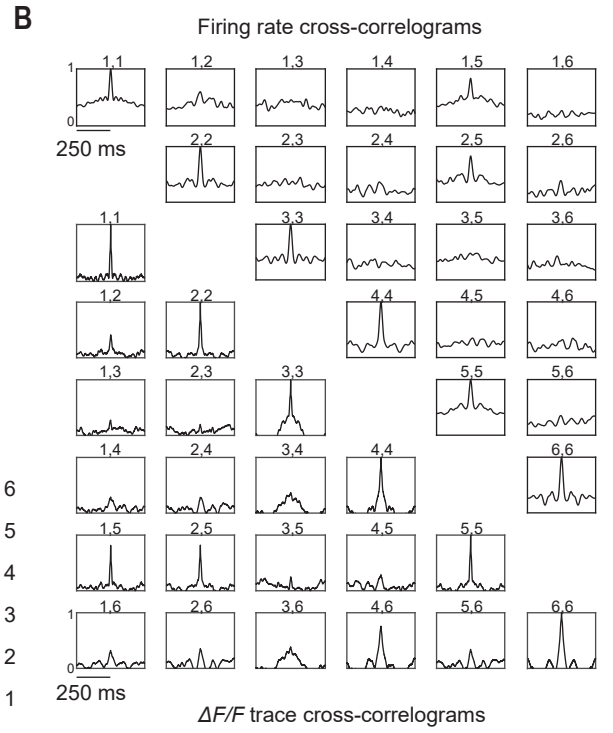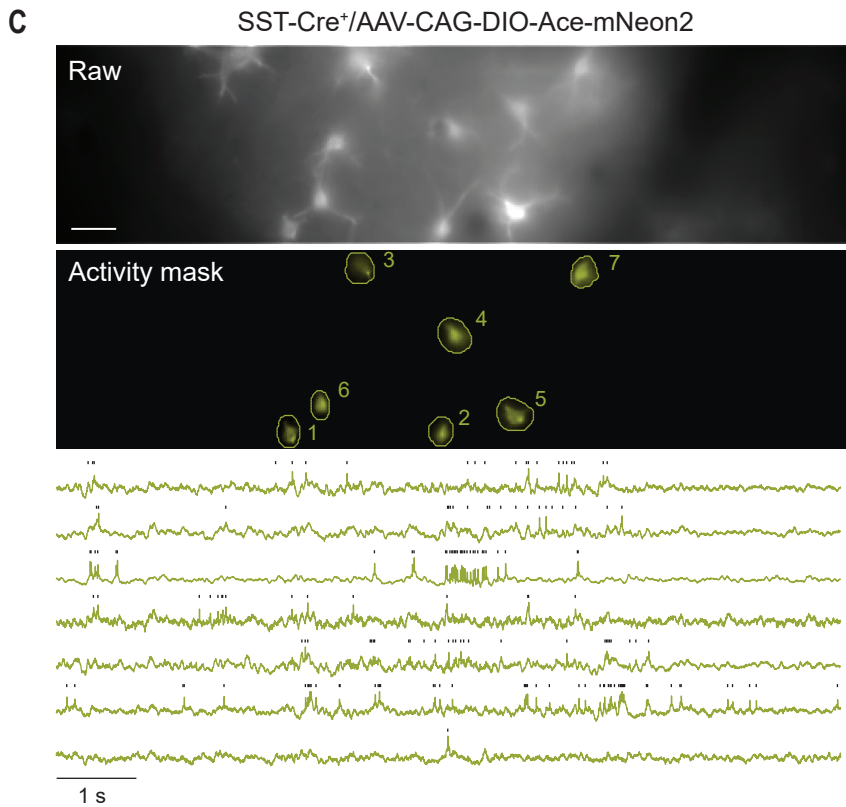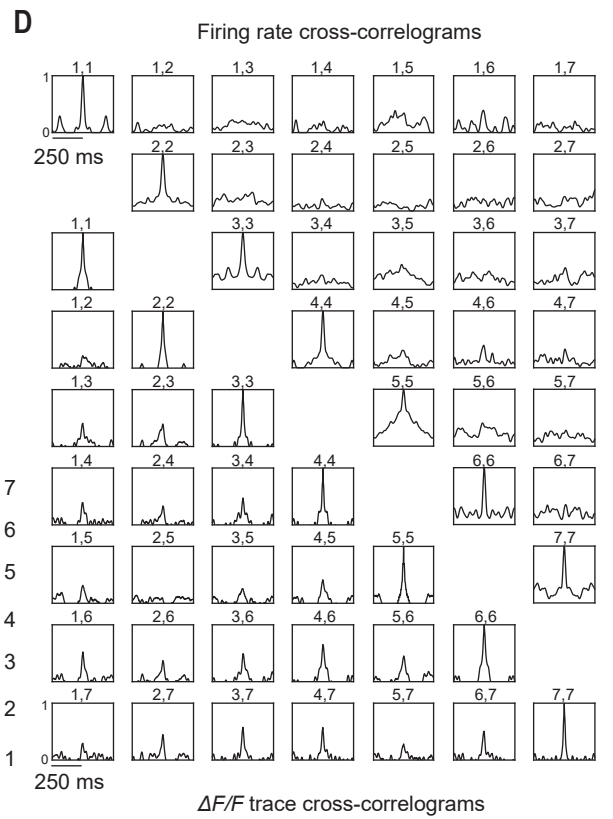

E

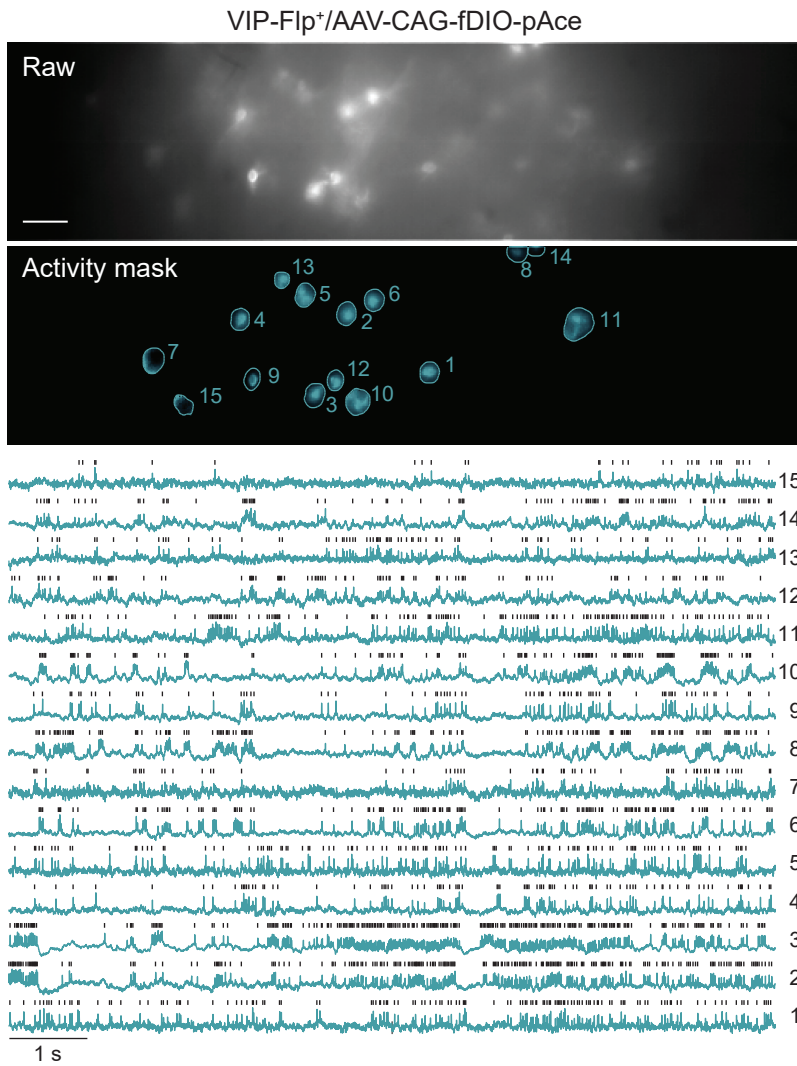

F

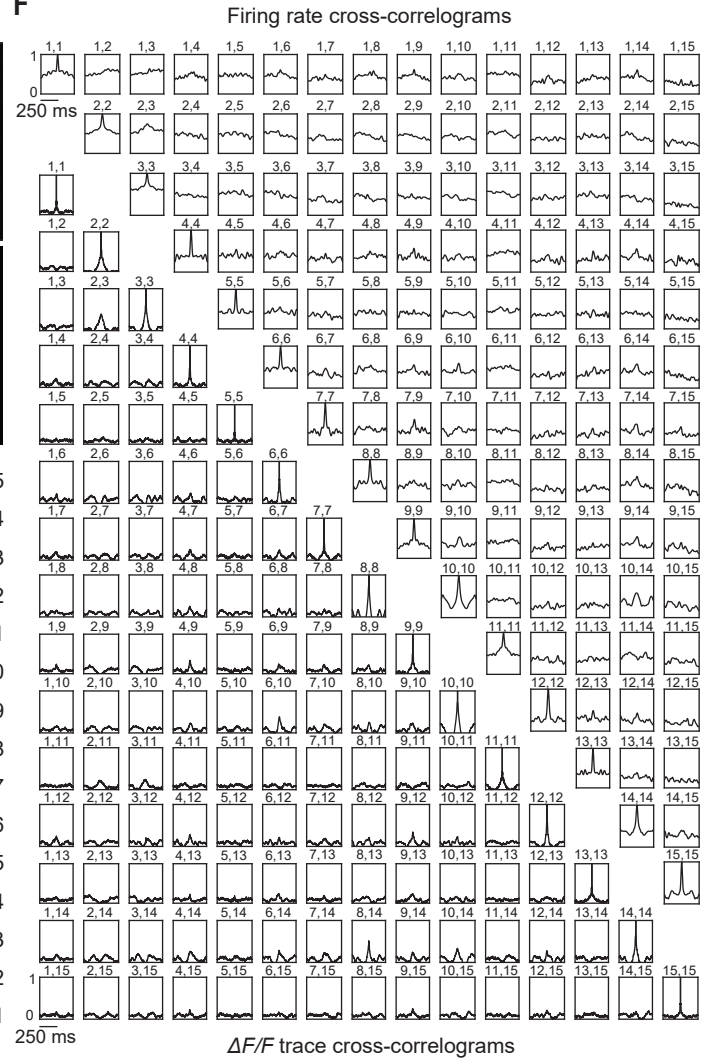

**Figure S17** | Minimal cross-contamination of voltage signals from adjacent cells in widefield recordings.

(A) *Top*, Representative epifluorescence image of a single field-of-view from a VIP-*Cre*<sup>+</sup> mouse, expressing *Cre*-dependent soma-targeted Ace-mNeon2 in V1. Scale bar: 50  $\mu$ m. *Center*, mask image showing active ROIs. *Bottom*,  $\Delta F/F$  traces showing spontaneous activity from the ROIs numbered in the mask image.

(B) Auto- and cross-correlograms of *top*, the firing rates with a sliding window of 20 ms and *bottom*, the  $\Delta F/F$  traces for neuron-pairs in the field-of-view above.

(C) Same as (A) for recordings from an SST-*Cre*<sup>+</sup> mouse.

(D) Same as (B) for the field-of-view in (C).

(E) Same as (A) for recordings from a VIP-*Flp*<sup>+</sup> mouse, expressing *Flp*-dependent soma-targeted pAce in V1.

(F) Same as (B) for the field-of-view in (E).

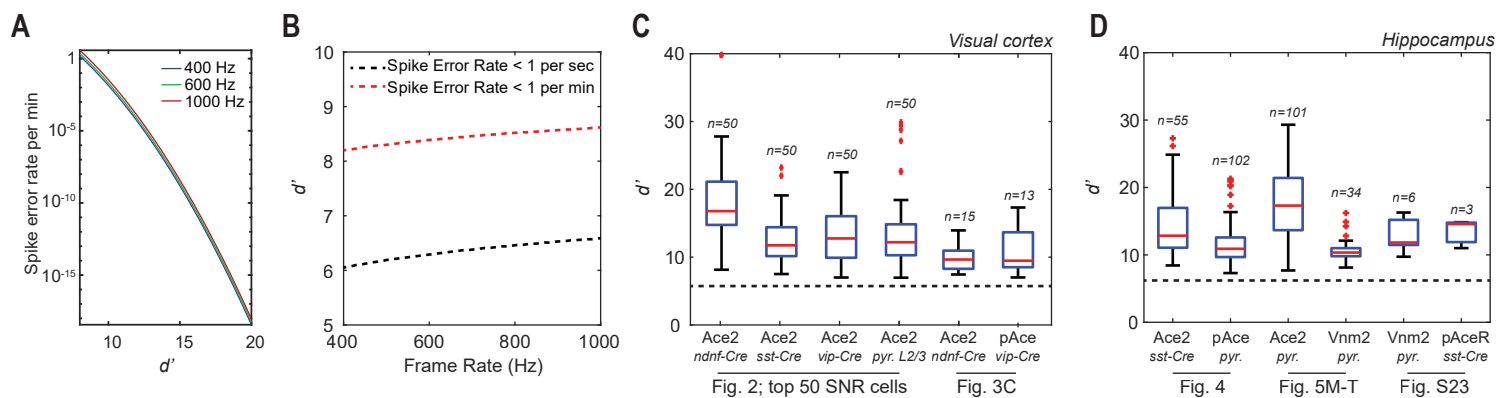

**Figure S18** | Spike detection fidelity index  $d'$  estimated for the four GEVIs expressed in various hippocampal and cortical cell-types. (A) Spike detection error rate as a function of  $d'$  for the three different imaging frame rates used in this study (see Materials and methods and Wilt *et al.*, 2013 (38)).

(B) Minimum  $d'$  values required to reach a given spike detection error rate as a function of the imaging frame rate.

(C-D) Box plot of  $d'$  values for different datasets acquired in (B) visual cortex and (C) hippocampus. The indicator, cell-type, and associated main figure panel/s are indicated on the x-axis. For each box plot, the central red line, bottom, and top edges indicate the median, 25th, and 75th percentile values, respectively. Outliers '+' are values beyond 1.5 times the interquartile range from the top or bottom edge of the box. The whiskers extend to the data points not considered outliers.

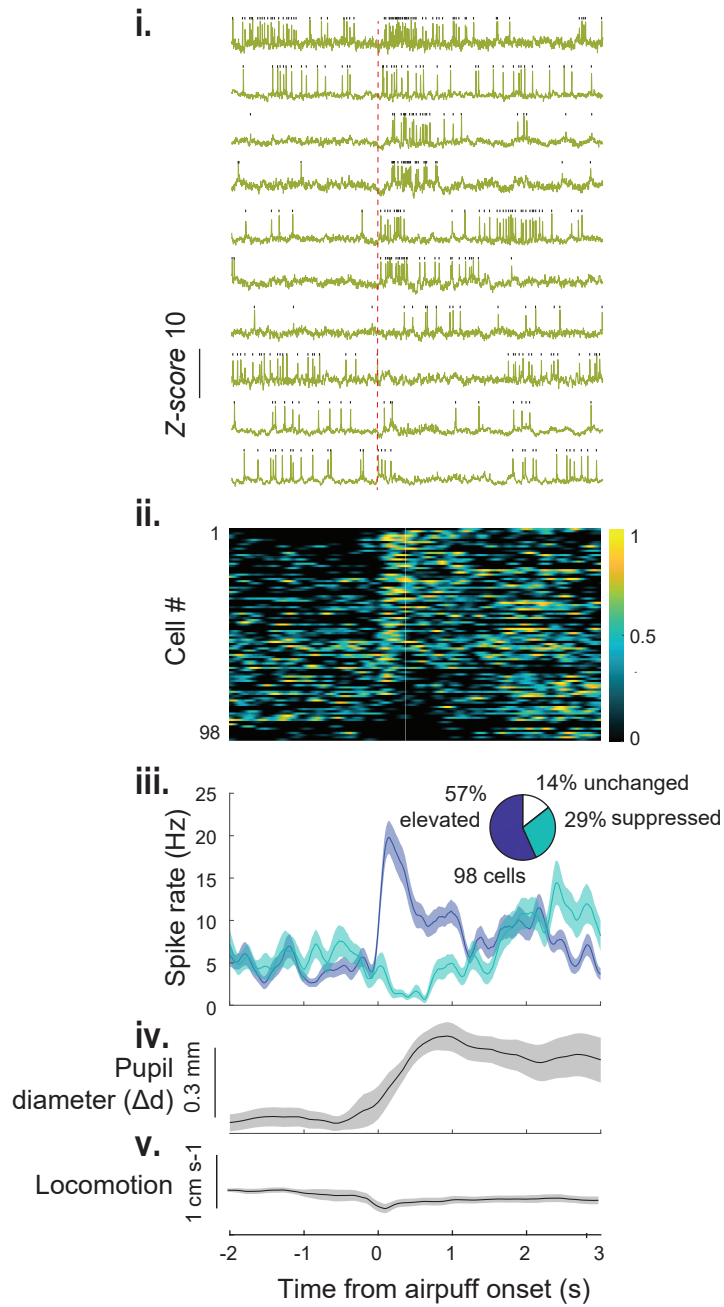

**Figure S19** | Effects of arousal without locomotion on VIP-interneuron firing rates.

(i) Example fluorescence-time traces from individual VIP-interneurons. Vertical dashed line indicates air puff onset. Grey ticks denote identified spikes. (ii) Z-scored firing rate PSTH for all VIP-interneurons (n=98 cells, 8 mice). Cells are arranged in order of decreasing spike modulation indices (see Methods). (iii) Mean  $\pm$  S.E.M. firing rate aligned to air puff onset for activated (dark blue) and suppressed (cyan) fractions. Pie chart inset indicates % cells with elevated (dark blue), suppressed (cyan), or unchanged (white) spike rates following air puff. (iv) Mean  $\pm$  S.E.M. change in pupil diameter for all trials. (v) Mean  $\pm$  S.E.M. locomotory speed for all trials.

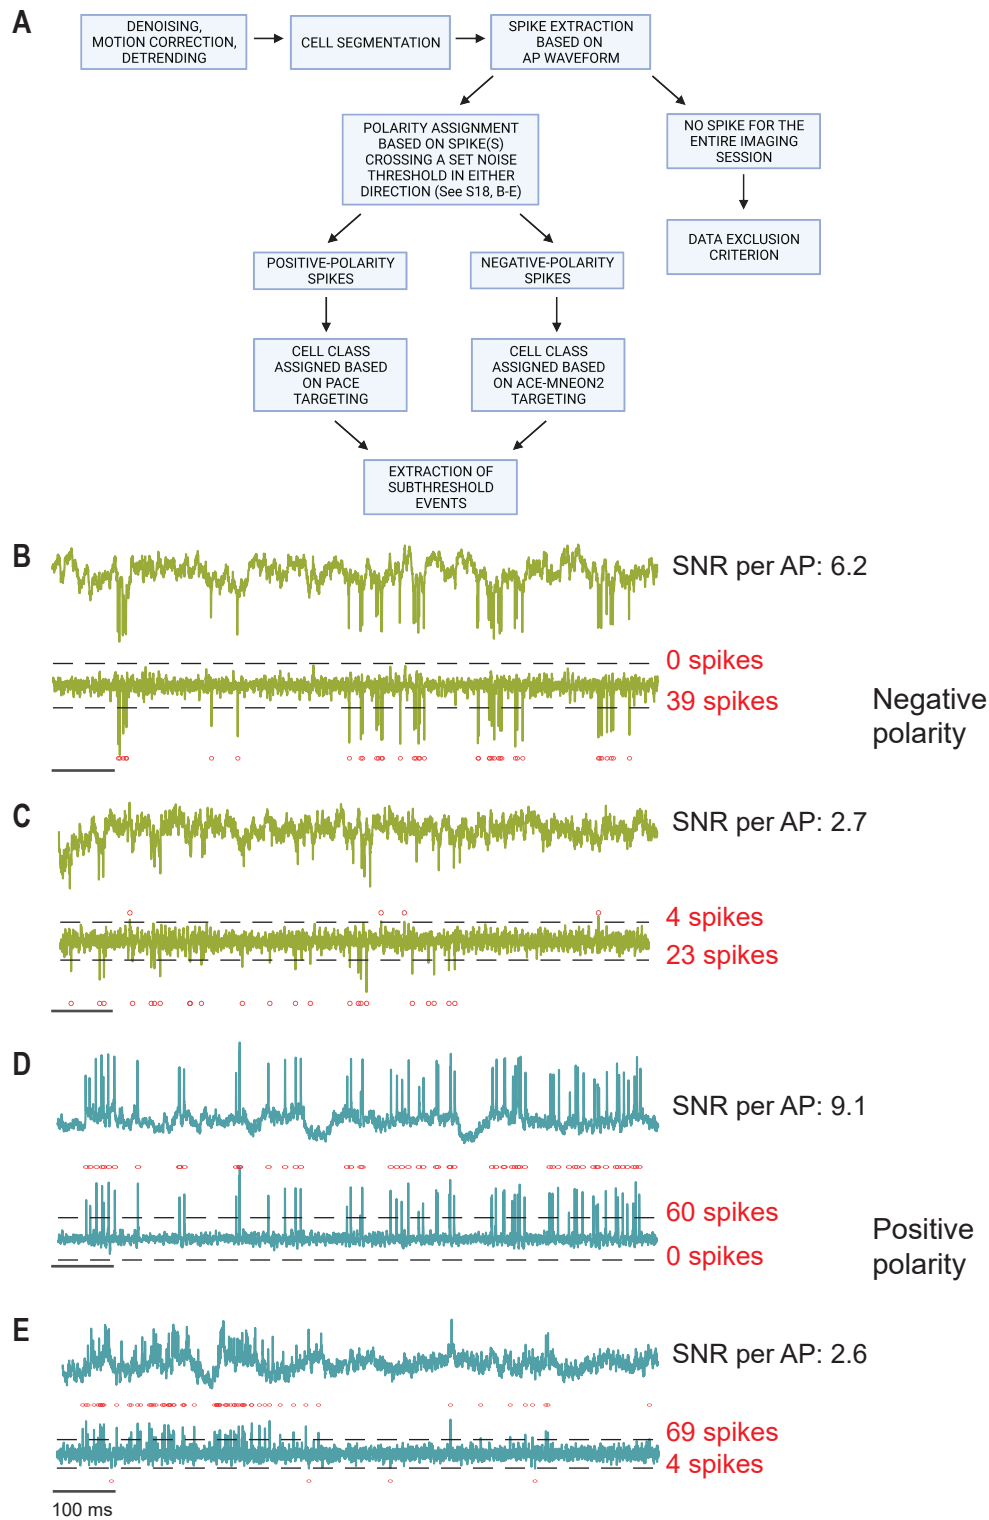

**Figure S20** | Polarity assignment in V1 DUPLEX recordings in awake mice (see also Methods).

(A) Schematic of the automated data analyses pipeline with integrated cell sorting. Briefly, all fluorescent cells are identified and fed into the spike extraction algorithm, which identifies spikes based on AP waveform characteristics. Trials with no APs meet the data exclusion criterion and are removed from further analyses. Cell-class identity is established based on whether the identified spikes are of positive or negative polarity (see B-E). Subthreshold events for data curation are extracted after cell-class is determined.

(B) *Top*, representative raw and, *bottom*, spike-identified  $\Delta F/F$  traces from a cell exhibiting negative-polarity spikes at high SNR. Dashed lines indicate 3x S.D. of baseline in either direction. Transients that surpassed this threshold were identified as spikes (red circles) and the direction with the most number of spikes determined the spike polarity. Thus, this neuron was assigned a negative-polarity and the neuron-type was inferred based on Ace-mNeon2 targeting.

(C) Same as (B) for a low SNR trace.

(D) *Top*, representative raw and, *bottom*, spike-identified  $\Delta F/F$  traces from a cell exhibiting positive-polarity spikes at high SNR. Dashed lines indicate 3x S.D. of baseline in either direction. Transients that surpassed this threshold were identified as spikes (red circles) and the direction with the most number of spikes determined the spike polarity. Thus, this neuron was assigned a positive-polarity and the neuron-type was inferred based on pAce targeting.

(E) Same as (D) for a low SNR trace.

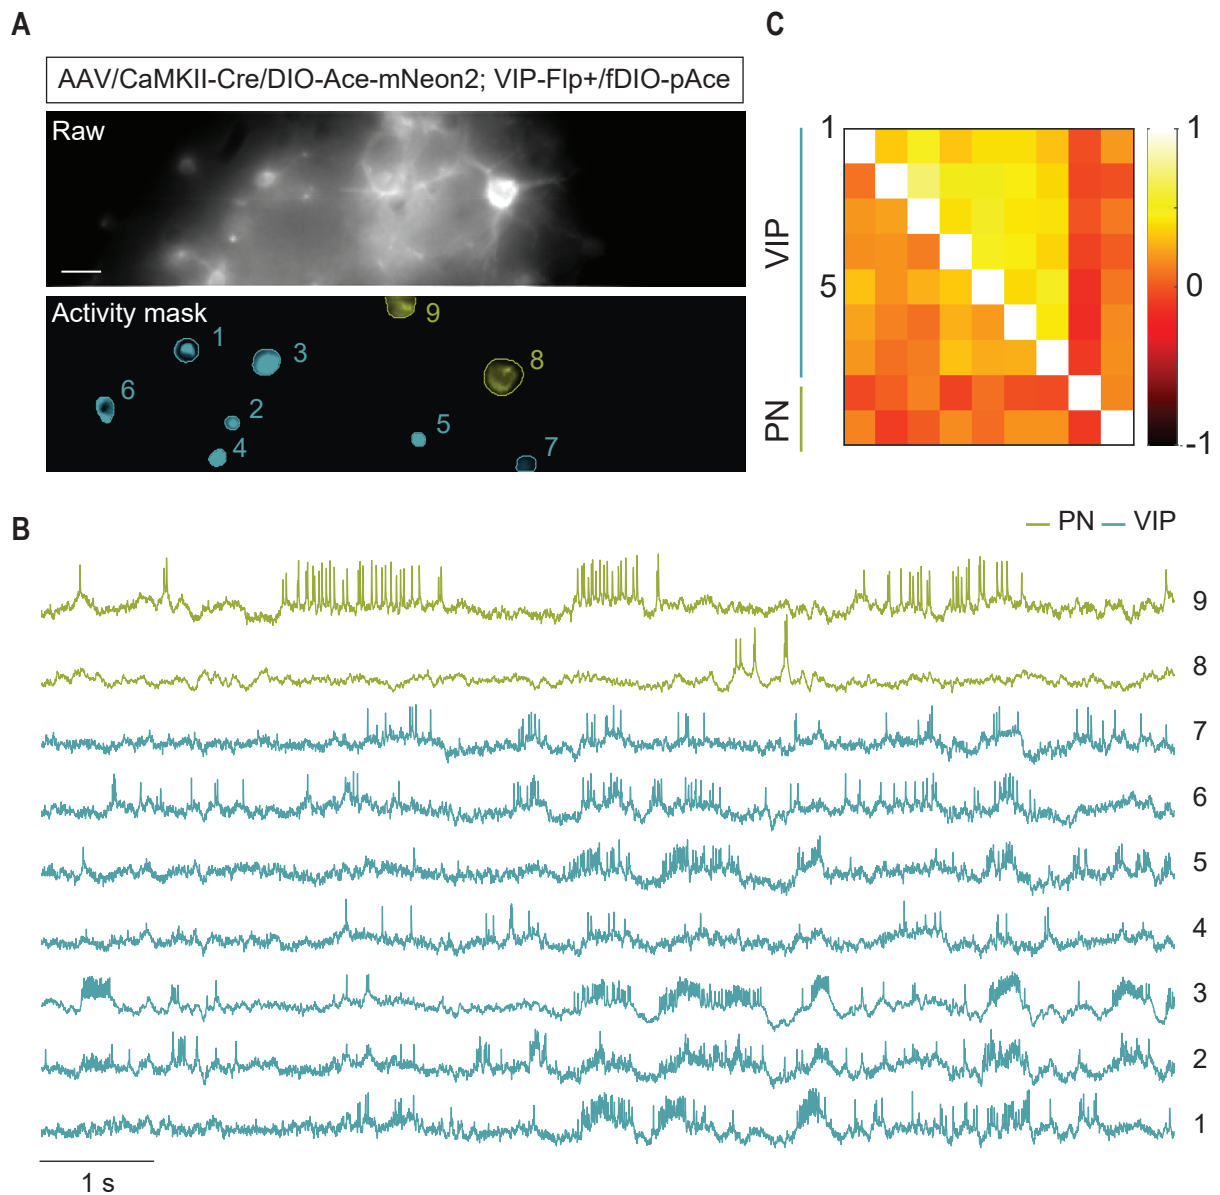

**Figure S21** | Example DUPLEX recordings from PNs and VIP-interneurons.

(A) Raw epifluorescence (*top*) and activity-mask (*bottom*) images of a single field-of-view from a *VIP-Flp<sup>+</sup>* mouse expressing *Ace-mNeon2* in PNs (green) and *pAce* in VIP-interneurons (blue). Active regions-of-interest (ROIs) are numbered. Scale bar: 50  $\mu\text{m}$ .

(B)  $\Delta F/F$  traces from the ROIs numbered in (A). *Ace-mNeon2* traces are inverted for visualization purposes.

(C) Intra- and inter-population correlation coefficient matrix constructed from pairwise, zero time-lag correlation coefficients of the  $\Delta F/F$  traces in (B).

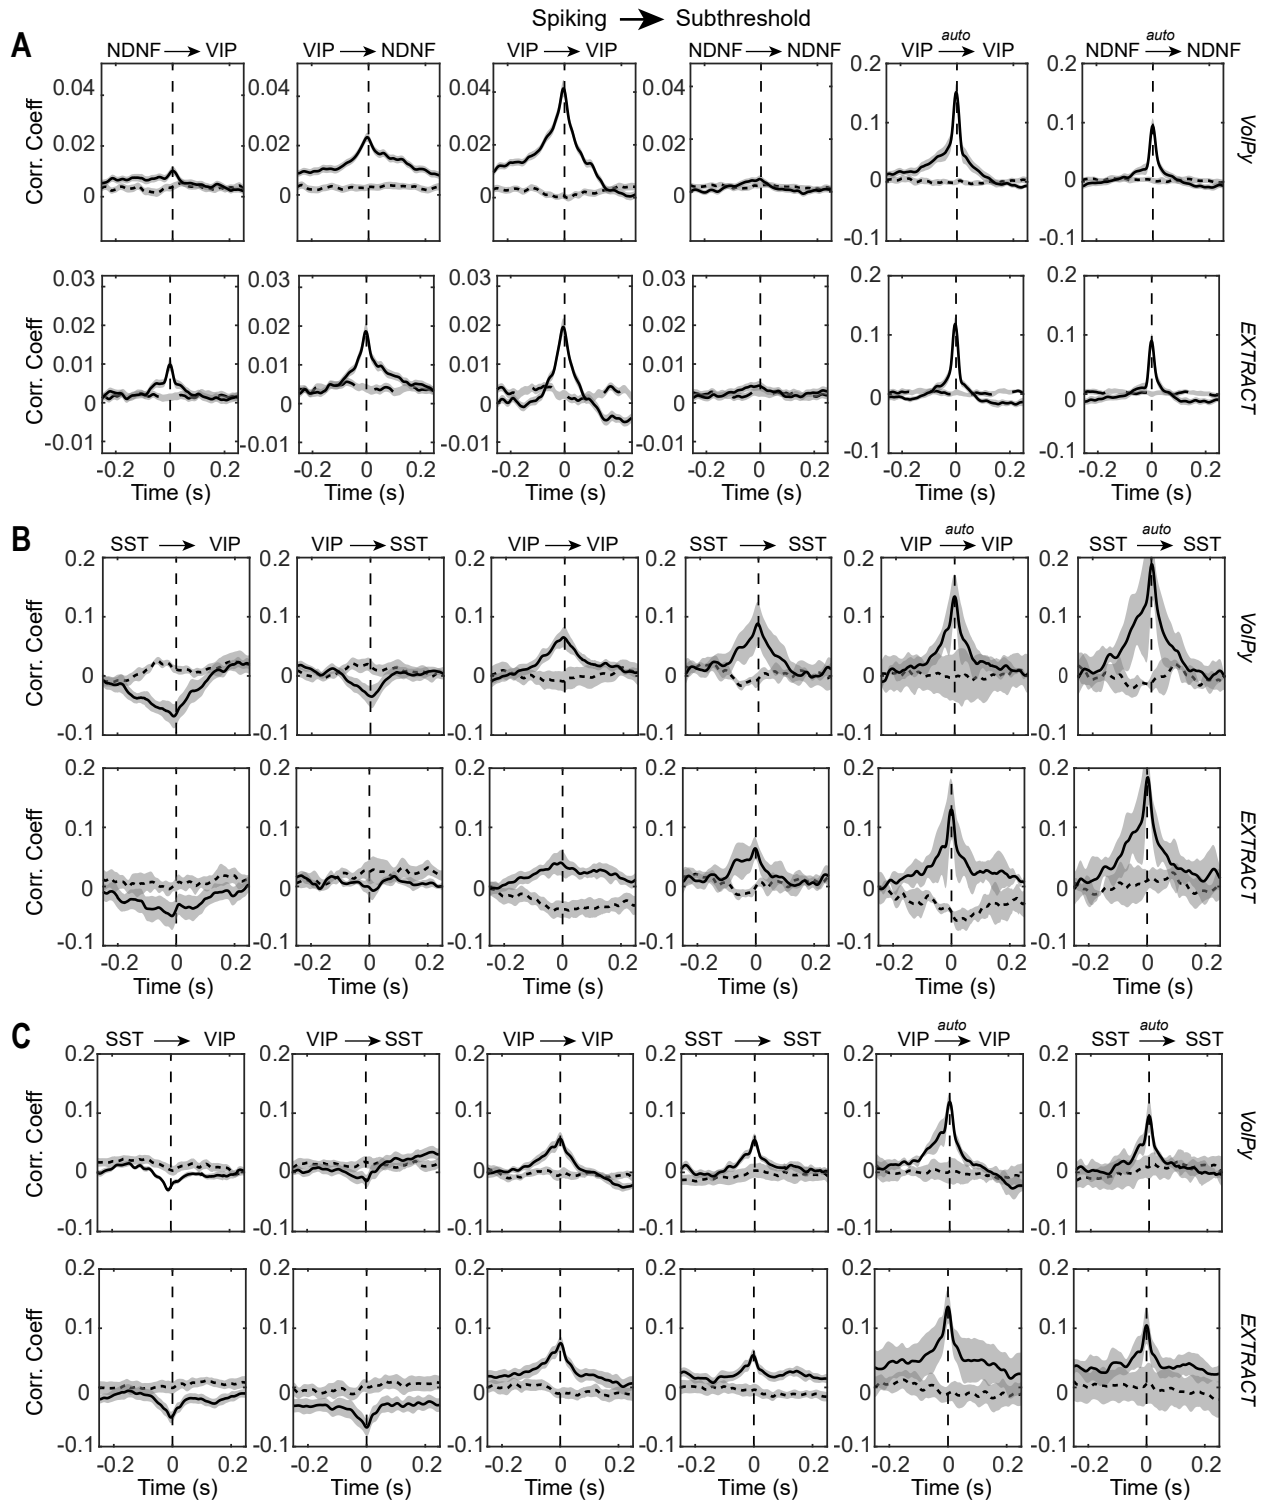

**Figure S22** | Spiking and subthreshold cross-correlations within and between cell-types in DUPLEX recordings during spontaneous behavior.

(A) NDNF/VIP DUPLEX recording (from Fig. 3, C-D) ( $n=13$  NDNF neurons,  $n=15$  VIP neurons).

(B) SST/VIP DUPLEX recording (from Fig. 3, E-F) ( $n=3$  SST neurons,  $n=4$  VIP neurons).

(C) Additional field-of-view of SST/VIP DUPLEX recording ( $n=5$  SST neurons,  $n=5$  VIP neurons).

Solid plots represent cross- or auto-correlograms. Dotted plots represent shuffled correlograms, obtained from random circular permutations of spike trains. The first 2 columns are cross-correlograms of spiking in one with the subthreshold activity in another class, the central 2 columns are cross-correlograms of spiking with subthreshold within the same class but across distinct neurons, and the last 2 columns are auto-correlograms for the same neurons. All results are qualitatively identical whether VoIPy or EXTRACT algorithms were used for automatic cell segmentation. The anti-correlation between spiking and subthreshold dynamics is only observed between SST and VIP. This anticorrelation is likely a bona fide phenomenon, by which the firing pattern in one cell-type predicts the subthreshold activity in another cell-type. Indeed, a DUPLEX-related artifact should equally affect all DUPLEX recordings, irrespective of cell-types, which is not the case for NDNF/VIP recordings. Note that the VIP plots are consistent across (A-C), and that the last two columns are reminiscent of Fig. S15, L-N, showing that spiking occurs during a depolarized state.



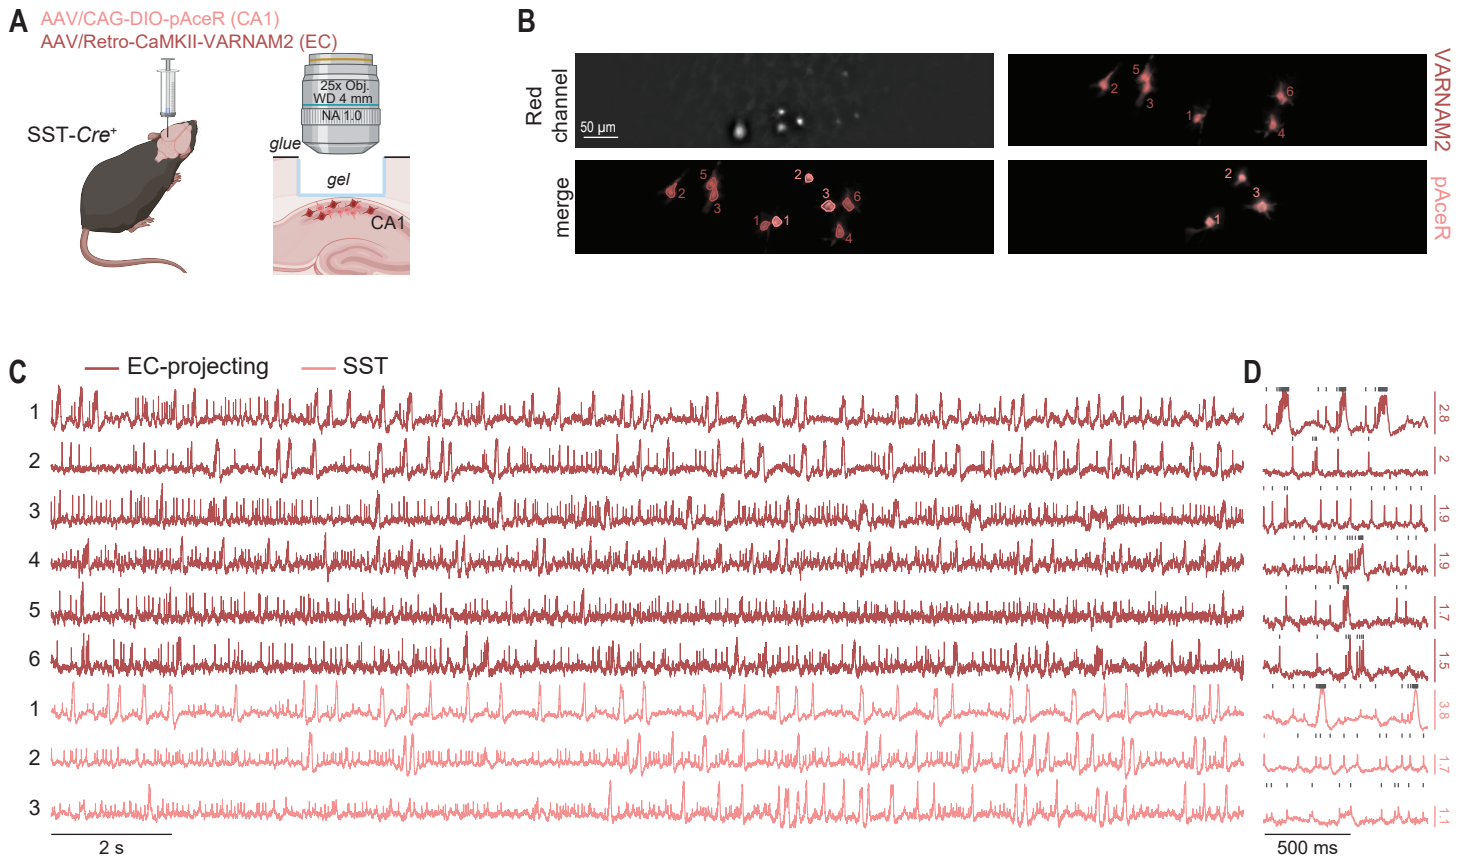

**Figure S23** | Red-DUPLEX reports the simultaneous voltage dynamics from two genetically identified neuron classes in hippocampus of awake mice.

(A) Schematic of AAV injections and experimental setup for red-DUPLEX using VARNAM2 and pAceR.

(B) Representative raw epifluorescence image and spatial footprints of negative- and positive-polarity signals (in dark red and pink, respectively) of 6 and 3 identified neurons. Scale bar: 50  $\mu$ m.

(C)  $\Delta F/F$  traces for all neurons in (B), representing CA1 EC-projecting excitatory neurons, and local SST-interneurons expressing VARNAM2 and pAceR, respectively. VARNAM2 traces are inverted for visualization purposes.

(D) First 1 s of (C), with the location of detected spikes. The scale bars to the right indicate peak-to-peak  $\Delta F/F$ (%).

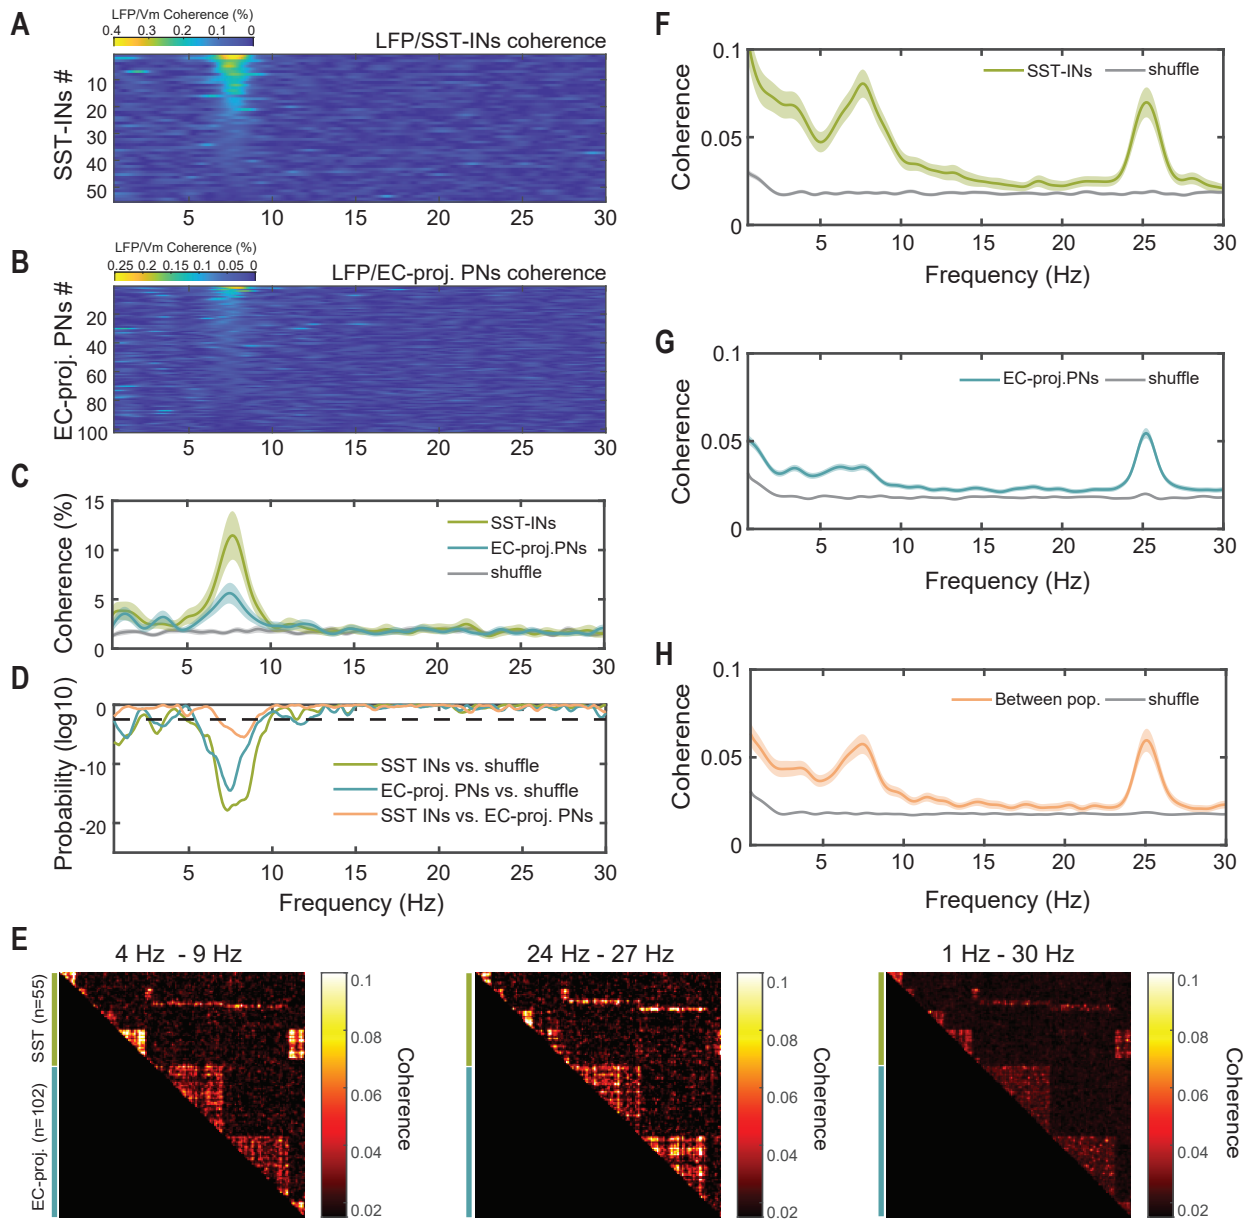

**Figure S24** | Subthreshold contributions of excitatory versus inhibitory neuronal populations to the local field potentials and pairwise coherence of excitatory/inhibitory neuronal ensembles.

(A-D) Subthreshold analysis of excitatory versus inhibitory contributions to local field potentials.

(A) LFP coherence raster plot for all SST-interneurons (n=55 cells, 6 fields-of-view, 1 mouse), sorted by theta-band coherence strength.

(B) LFP coherence raster plot for all EC-projecting PNs (n=102 cells, 6 fields-of-view, 1 mouse), sorted by theta-band coherence strength.

(C) LFP coherence averages across all neurons in (A-B). Shaded area: 95% CI.

(D) Pairwise probability of data from (C), assessed at each frequency point using Wilcoxon rank sum test. The dashed line corresponds to Bonferroni-corrected significance threshold ( $P < 0.01$ ).

(E-H) Frequency-averaged coherence between excitatory/inhibitory neuronal ensembles.

(E) Pairwise coherence matrices averaged over narrow band theta (4-9 Hz, *left*), beta (24-27 Hz, *center*), or broad band frequencies (1-30 Hz, *right*). Note that the off-diagonal hot-spot patches represent neuronal ensembles belonging to the same fields-of-view.

(F-H) Population-averaged pairwise coherence plots computed for (F) SST-neuronal ensembles, (G) EC-projecting PN ensembles, and (H) between SST-interneurons and EC-projecting PNs. Note that neuronal ensembles are more strongly correlated in the theta and beta frequencies, suggesting shared synaptic inputs at those frequencies. Shuffle traces are estimated from neurons belonging to different fields-of-view. Shaded area: 95% CI.

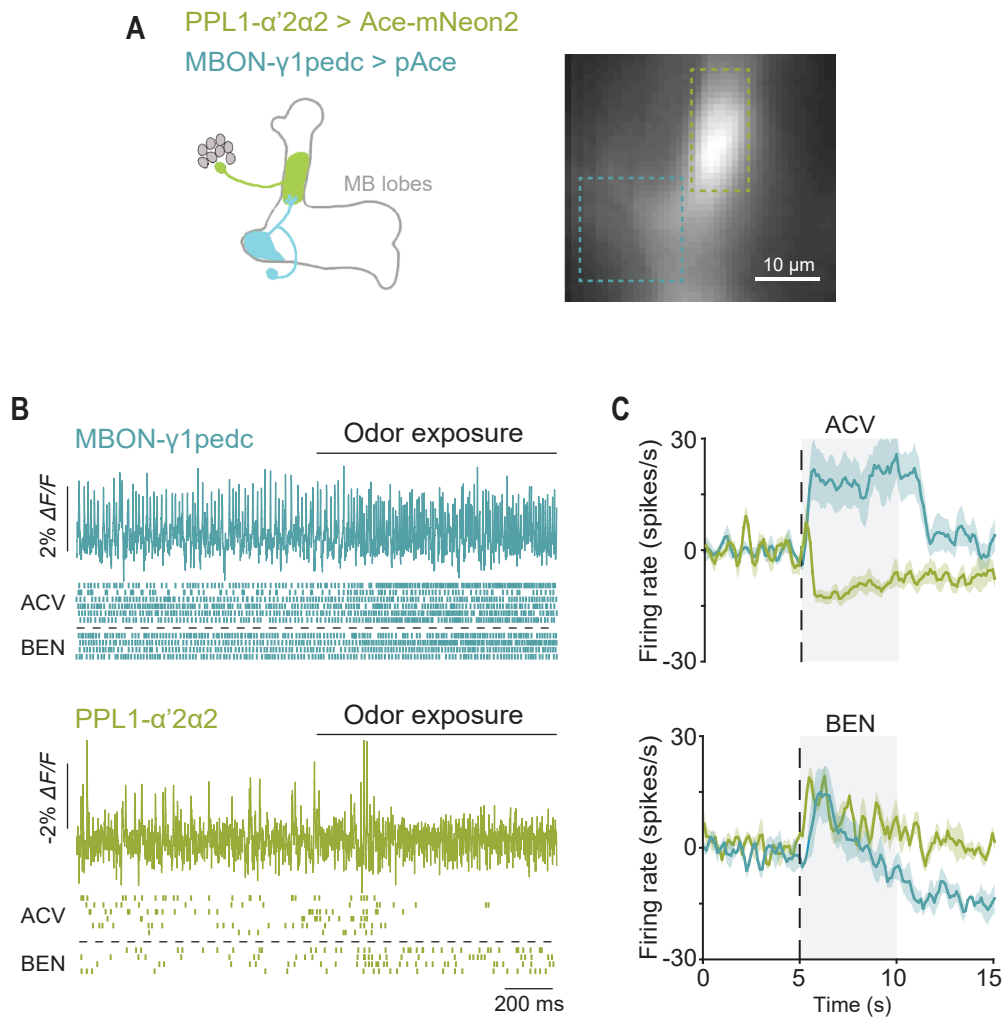

**Figure S25** | Dual-polarity voltage imaging in flies.

(A) *Left*, Cartoon and *right*, epifluorescence image showing expression of Ace-mNeon2 and pAce in two synaptically connected neuron-types for simultaneous dual-polarity voltage imaging. Dashed boxes indicate regions-of-interest comprising the axonal region of PPL1- $\alpha'2\alpha2$  neuron (green, Ace-mNeon2) and the dendritic region of MBON- $\gamma1pedc$  >  $\alpha/\beta$  neuron (blue, pAce).

(B) Example traces of evoked spiking during a 2 s time-window around odor onset from a 15-s imaging trial. Raster plots showing responses during 6 trials of exposure to the attractive odorant apple cider vinegar (ACV) and 4 trials of exposure to the repulsive odorant benzaldehyde (BEN) obtained from PPL1- $\alpha'2\alpha2$  and MBON- $\gamma1pedc$  >  $\alpha/\beta$  neurons.

(C) Mean spike rate change during ACV (*top*) and BEN (*bottom*) exposure in the two neurons. (n = 6 trials for ACV; n = 4 trials for BEN; 2 trials per fly).

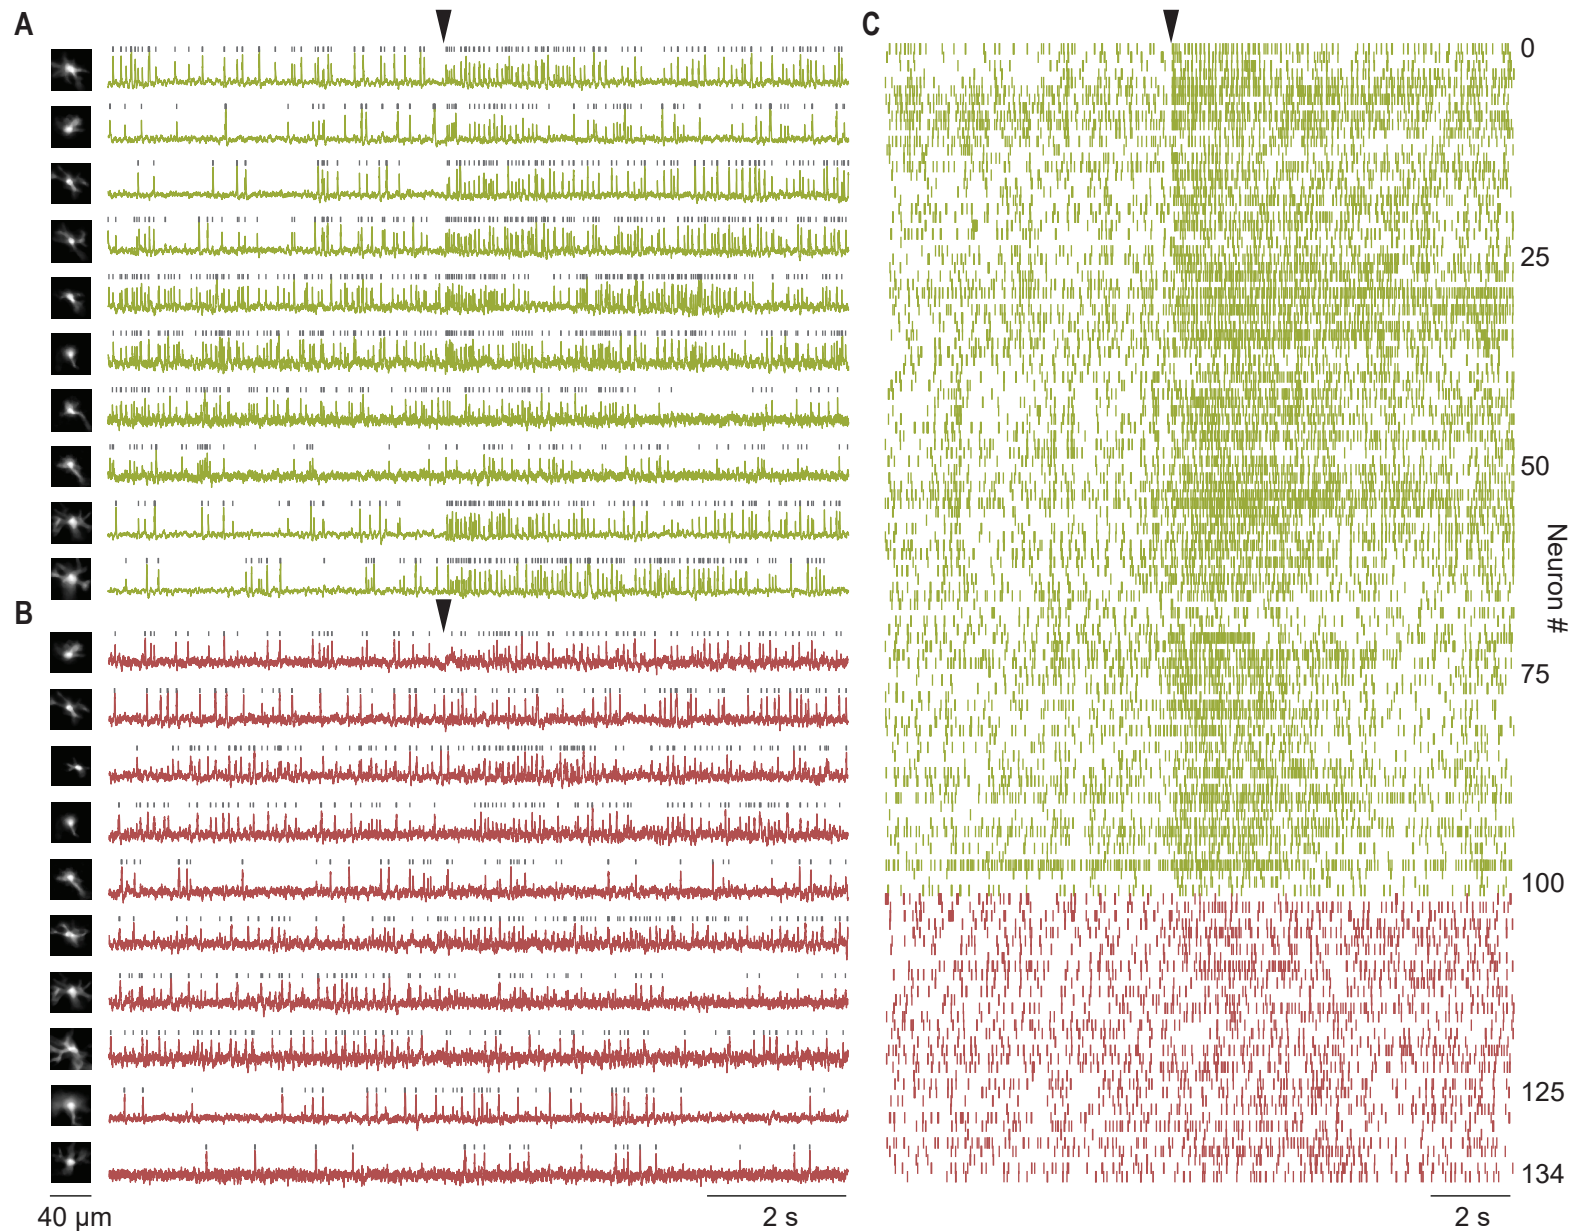

**Figure S26** | Voltage recordings from ACC- and EC-projecting excitatory neurons in dorsal CA1 in an awake behaving mouse during behavioral state transition. (A) Example  $\Delta F/F$  traces from ACC-projecting PNs retrogradely labeled with Ace-mNeon2. (B) Example  $\Delta F/F$  traces from EC-projecting PNs retrogradely labelled with VARNAM2. (C) Summary raster plot for all 134 projection neurons (n=5 fields-of-view, 1 mouse). Arrows indicate rest-to-run transition onset.

|                                  | Ace1 <sup>a</sup> | Vnm1 <sup>a</sup> | Voltron <sup>b</sup> | Ace2 <sup>c</sup> | Vnm2 <sup>c</sup> | Positron <sup>b</sup> | pAce <sup>c</sup> | pAceR <sup>c</sup> | Archon1 <sup>d</sup> | QuasAr6a <sup>d</sup> | QuasAr6b <sup>d</sup> | ASAP2 <sup>e</sup> | ASAP3 <sup>e</sup> | ASAP4b <sup>f</sup> | ASAP4e <sup>f</sup> |
|----------------------------------|-------------------|-------------------|----------------------|-------------------|-------------------|-----------------------|-------------------|--------------------|----------------------|-----------------------|-----------------------|--------------------|--------------------|---------------------|---------------------|
| <b>Activation Kinetics</b>       |                   |                   |                      |                   |                   |                       |                   |                    |                      |                       |                       |                    |                    |                     |                     |
| Fast component amplitude (%)     | 60*               | 60*               | 61                   | 67                | 68                | 85                    | 82                | 54                 | 93                   | 96                    | 100                   | 77                 | 81                 | 19                  | 14                  |
| Fast time constant (ms)          | 0.81              | 0.88              | 0.64                 | 0.77              | 0.5               | 0.63                  | 0.51              | 2.4                | 2.5                  | 2.6                   | 1.8                   | 7                  | 3.7                | 2.6                 | 3.9                 |
| Slow time constant (ms)          | 4.6               | 5.2               | 4.1                  | 3.1               | 1.9               | 19                    | 1.5               | 5.4                | 13                   | 21                    | 0                     | 79                 | 48                 | 21.2                | 20.6                |
| <b>Deactivation Kinetics</b>     |                   |                   |                      |                   |                   |                       |                   |                    |                      |                       |                       |                    |                    |                     |                     |
| Fast component amplitude (%)     | 60*               | 60*               | 55                   | 65                | 72                | 90                    | 78                | 58                 | 94                   | 98                    | 96                    | 65                 | 81                 | 8.8                 | 20.6                |
| Fast time constant (ms)          | 0.77              | 0.8               | 0.78                 | 0.81              | 0.48              | 0.64                  | 0.61              | 1.9                | 2                    | 2.1                   | 1.7                   | 16.7               | 16                 | 5.7                 | 8.4                 |
| Slow time constant (ms)          | 5.2               | 4.7               | 3.9                  | 2.8               | 3.1               | 37                    | 3.2               | 7.2                | 17                   | 31                    | 22                    | 116                | 102                | 24.5                | 17.5                |
| <b>Voltage Sensitivity</b>       |                   |                   |                      |                   |                   |                       |                   |                    |                      |                       |                       |                    |                    |                     |                     |
| $\Delta F/F$ per 100-mV step (%) | -11.6             | -11.8             | -20                  | -26.1             | -19.1             | 20                    | 30.5              | 27.8               | 70                   | 73                    | 24                    | -36                | -51                | 180                 | 210                 |

**Table S1** | Response kinetics and voltage sensitivities of GEVIs.

All kinetics parameters are from 1-photon measurements at 22°C in spiking HEK cells. Values have been extracted from the following publications: (a) Kannan *et al*, Nature Methods, 2018 (18); (b) Abdelfattah *et al*, Nature Communications, 2020 (14); (c) this study; (d) Tian *et al*, BioRxiv, 2021 (87); (e) Villette *et al*, Cell, 2019 (20); (f) Evans *et al*, BioRxiv 2021 (88). (\*) amplitudes were not estimated in (a) and approximate values were taken from (e).

For indicators reported in this study, responses to depolarizing voltage steps obtained from transfected HEK cells were fitted using a biexponential step function to determine mean rise and decay kinetics. Imaging conditions: 505 nm LED for Ace-mNeon2 and pAce and 565 nm LED for VARNAM2 and pAceR, 25 mW mm<sup>-2</sup> at sample plane; image acquisition: 5 kHz. n=6 cells for Ace-mNeon2, 7 cells for pAce, 4 cells each for VARNAM2 and pAceR.

## References and Notes

1. K. A. Ferguson, J. A. Cardin, Mechanisms underlying gain modulation in the cortex. *Nat. Rev. Neurosci.* **21**, 80–92 (2020). [doi:10.1038/s41583-019-0253-y](https://doi.org/10.1038/s41583-019-0253-y) [Medline](#)
2. Y. Fu, J. M. Tucciarone, J. S. Espinosa, N. Sheng, D. P. Darcy, R. A. Nicoll, Z. J. Huang, M. P. Stryker, A cortical circuit for gain control by behavioral state. *Cell* **156**, 1139–1152 (2014). [doi:10.1016/j.cell.2014.01.050](https://doi.org/10.1016/j.cell.2014.01.050) [Medline](#)
3. C. C. Y. Lee, E. Kheradpezhoh, M. E. Diamond, E. Arabzadeh, State-dependent changes in perception and coding in the mouse somatosensory cortex. *Cell Rep.* **32**, 108197 (2020). [doi:10.1016/j.celrep.2020.108197](https://doi.org/10.1016/j.celrep.2020.108197) [Medline](#)
4. P.-O. Polack, J. Friedman, P. Golshani, Cellular mechanisms of brain state-dependent gain modulation in visual cortex. *Nat. Neurosci.* **16**, 1331–1339 (2013). [doi:10.1038/nn.3464](https://doi.org/10.1038/nn.3464) [Medline](#)
5. J. Schiemann, P. Puggioni, J. Dacre, M. Pelko, A. Domanski, M. C. W. van Rossum, I. Duguid, Cellular mechanisms underlying behavioral state-dependent bidirectional modulation of motor cortex output. *Cell Rep.* **11**, 1319–1330 (2015). [doi:10.1016/j.celrep.2015.04.042](https://doi.org/10.1016/j.celrep.2015.04.042) [Medline](#)
6. B. K. Hulse, E. V. Lubenov, A. G. Siapas, Brain state dependence of hippocampal subthreshold activity in awake mice. *Cell Rep.* **18**, 136–147 (2017). [doi:10.1016/j.celrep.2016.11.084](https://doi.org/10.1016/j.celrep.2016.11.084) [Medline](#)
7. P. Rajasethupathy, S. Sankaran, J. H. Marshel, C. K. Kim, E. Ferenczi, S. Y. Lee, A. Berndt, C. Ramakrishnan, A. Jaffe, M. Lo, C. Liston, K. Deisseroth, Projections from neocortex mediate top-down control of memory retrieval. *Nature* **526**, 653–659 (2015). [doi:10.1038/nature15389](https://doi.org/10.1038/nature15389) [Medline](#)
8. K. Q. Shan, E. V. Lubenov, M. Papadopoulou, A. G. Siapas, Spatial tuning and brain state account for dorsal hippocampal CA1 activity in a non-spatial learning task. *eLife* **5**, e14321 (2016). [doi:10.7554/eLife.14321](https://doi.org/10.7554/eLife.14321) [Medline](#)
9. C. Xu, S. Krabbe, J. Gründemann, P. Botta, J. P. Fadok, F. Osakada, D. Saur, B. F. Grewe, M. J. Schnitzer, E. M. Callaway, A. Lüthi, Distinct hippocampal pathways mediate dissociable roles of context in memory retrieval. *Cell* **167**, 961–972.e16 (2016). [doi:10.1016/j.cell.2016.09.051](https://doi.org/10.1016/j.cell.2016.09.051) [Medline](#)
10. M. Kannan, G. Vasan, V. A. Pieribone, Optimizing strategies for developing genetically encoded voltage indicators. *Front. Cell. Neurosci.* **13**, 53 (2019). [doi:10.3389/fncel.2019.00053](https://doi.org/10.3389/fncel.2019.00053) [Medline](#)
11. T. Knöpfel, C. Song, Optical voltage imaging in neurons: Moving from technology development to practical tool. *Nat. Rev. Neurosci.* **20**, 719–727 (2019). [doi:10.1038/s41583-019-0231-4](https://doi.org/10.1038/s41583-019-0231-4) [Medline](#)
12. H. H. Yang, F. St-Pierre, Genetically encoded voltage indicators: Opportunities and challenges. *J. Neurosci.* **36**, 9977–9989 (2016). [doi:10.1523/JNEUROSCI.1095-16.2016](https://doi.org/10.1523/JNEUROSCI.1095-16.2016) [Medline](#)

13. A. S. Abdelfattah, T. Kawashima, A. Singh, O. Novak, H. Liu, Y. Shuai, Y.-C. Huang, L. Campagnola, S. C. Seeman, J. Yu, J. Zheng, J. B. Grimm, R. Patel, J. Friedrich, B. D. Mensh, L. Paninski, J. J. Macklin, G. J. Murphy, K. Podgorski, B.-J. Lin, T.-W. Chen, G. C. Turner, Z. Liu, M. Koyama, K. Svoboda, M. B. Ahrens, L. D. Lavis, E. R. Schreiter, Bright and photostable chemigenetic indicators for extended in vivo voltage imaging. *Science* **365**, 699–704 (2019). [doi:10.1126/science.aav6416](https://doi.org/10.1126/science.aav6416) [Medline](#)
14. A. S. Abdelfattah, R. Valenti, J. Zheng, A. Wong, K. Podgorski, M. Koyama, D. S. Kim, E. R. Schreiter, GENIE Project Team, A general approach to engineer positive-going eFRET voltage indicators. *Nat. Commun.* **11**, 3444 (2020). [doi:10.1038/s41467-020-17322-1](https://doi.org/10.1038/s41467-020-17322-1) [Medline](#)
15. S. Chamberland, H. H. Yang, M. M. Pan, S. W. Evans, S. Guan, M. Chavarha, Y. Yang, C. Salesse, H. Wu, J. C. Wu, T. R. Clandinin, K. Toth, M. Z. Lin, F. St-Pierre, Fast two-photon imaging of subcellular voltage dynamics in neuronal tissue with genetically encoded indicators. *eLife* **6**, e25690 (2017). [doi:10.7554/eLife.25690](https://doi.org/10.7554/eLife.25690) [Medline](#)
16. L. Z. Fan, S. Kheifets, U. L. Böhm, H. Wu, K. D. Piatkevich, M. E. Xie, V. Parot, Y. Ha, K. E. Evans, E. S. Boyden, A. E. Takesian, A. E. Cohen, All-optical electrophysiology reveals the role of lateral inhibition in sensory processing in cortical layer 1. *Cell* **180**, 521–535.e18 (2020). [doi:10.1016/j.cell.2020.01.001](https://doi.org/10.1016/j.cell.2020.01.001) [Medline](#)
17. Y. Gong, C. Huang, J. Z. Li, B. F. Grewe, Y. Zhang, S. Eismann, M. J. Schnitzer, High-speed recording of neural spikes in awake mice and flies with a fluorescent voltage sensor. *Science* **350**, 1361–1366 (2015). [doi:10.1126/science.aab0810](https://doi.org/10.1126/science.aab0810) [Medline](#)
18. M. Kannan, G. Vasan, C. Huang, S. Haziza, J. Z. Li, H. Inan, M. J. Schnitzer, V. A. Pieribone, Fast, in vivo voltage imaging using a red fluorescent indicator. *Nat. Methods* **15**, 1108–1116 (2018). [doi:10.1038/s41592-018-0188-7](https://doi.org/10.1038/s41592-018-0188-7) [Medline](#)
19. K. D. Piatkevich, E. E. Jung, C. Straub, C. Linghu, D. Park, H.-J. Suk, D. R. Hochbaum, D. Goodwin, E. Pnevmatikakis, N. Pak, T. Kawashima, C.-T. Yang, J. L. Rhoades, O. Shemesh, S. Asano, Y.-G. Yoon, L. Freifeld, J. L. Saulnier, C. Riegler, F. Engert, T. Hughes, M. Drobizhev, B. Szabo, M. B. Ahrens, S. W. Flavell, B. L. Sabatini, E. S. Boyden, A robotic multidimensional directed evolution approach applied to fluorescent voltage reporters. *Nat. Chem. Biol.* **14**, 352–360 (2018). [doi:10.1038/s41589-018-0004-9](https://doi.org/10.1038/s41589-018-0004-9) [Medline](#)
20. V. Villette, M. Chavarha, I. K. Dimov, J. Bradley, L. Pradhan, B. Mathieu, S. W. Evans, S. Chamberland, D. Shi, R. Yang, B. B. Kim, A. Ayon, A. Jalil, F. St-Pierre, M. J. Schnitzer, G. Bi, K. Toth, J. Ding, S. Dieudonné, M. Z. Lin, Ultrafast two-photon imaging of a high-gain voltage indicator in awake behaving mice. *Cell* **179**, 1590–1608.e23 (2019). [doi:10.1016/j.cell.2019.11.004](https://doi.org/10.1016/j.cell.2019.11.004) [Medline](#)
21. H. H. Yang, F. St-Pierre, X. Sun, X. Ding, M. Z. Lin, T. R. Clandinin, Subcellular imaging of voltage and calcium signals reveals neural processing in vivo. *Cell* **166**, 245–257 (2016). [doi:10.1016/j.cell.2016.05.031](https://doi.org/10.1016/j.cell.2016.05.031) [Medline](#)
22. Y. Adam, J. J. Kim, S. Lou, Y. Zhao, M. E. Xie, D. Brinks, H. Wu, M. A. Mostajo-Radji, S. Kheifets, V. Parot, S. Chettih, K. J. Williams, B. Gmeiner, S. L. Farhi, L. Madisen, E. K. Buchanan, I. Kinsella, D. Zhou, L. Paninski, C. D. Harvey, H. Zeng, P. Arlotta, R. E.

- Campbell, A. E. Cohen, Voltage imaging and optogenetics reveal behaviour-dependent changes in hippocampal dynamics. *Nature* **569**, 413–417 (2019). [doi:10.1038/s41586-019-1166-7](https://doi.org/10.1038/s41586-019-1166-7) [Medline](#)
23. K. D. Piatkevich, S. Bensussen, H. A. Tseng, S. N. Shroff, V. G. Lopez-Huerta, D. Park, E. E. Jung, O. A. Shemesh, C. Straub, H. J. Gritton, M. F. Romano, E. Costa, B. L. Sabatini, Z. Fu, E. S. Boyden, X. Han, Population imaging of neural activity in awake behaving mice. *Nature* **574**, 413–417 (2019). [doi:10.1038/s41586-019-1641-1](https://doi.org/10.1038/s41586-019-1641-1) [Medline](#)
24. S. Xiao, E. Lowet, H. J. Gritton, P. Fabris, Y. Wang, J. Sherman, R. A. Mount, H. A. Tseng, H.-Y. Man, C. Straub, K. D. Piatkevich, E. S. Boyden, J. Mertz, X. Han, Large-scale voltage imaging in behaving mice using targeted illumination. *iScience* **24**, 103263 (2021). [doi:10.1016/j.isci.2021.103263](https://doi.org/10.1016/j.isci.2021.103263) [Medline](#)
25. Y. Gong, M. J. Wagner, J. Zhong Li, M. J. Schnitzer, Imaging neural spiking in brain tissue using FRET-opsin protein voltage sensors. *Nat. Commun.* **5**, 3674 (2014). [doi:10.1038/ncomms4674](https://doi.org/10.1038/ncomms4674) [Medline](#)
26. P. Zou, Y. Zhao, A. D. Douglass, D. R. Hochbaum, D. Brinks, C. A. Werley, D. J. Harrison, R. E. Campbell, A. E. Cohen, Bright and fast multicoloured voltage reporters via electrochromic FRET. *Nat. Commun.* **5**, 4625 (2014). [doi:10.1038/ncomms5625](https://doi.org/10.1038/ncomms5625) [Medline](#)
27. D. R. Hochbaum, Y. Zhao, S. L. Farhi, N. Klapoetke, C. A. Werley, V. Kapoor, P. Zou, J. M. Kralj, D. Maclaurin, N. Smedemark-Margulies, J. L. Saulnier, G. L. Boulting, C. Straub, Y. K. Cho, M. Melkonian, G. K.-S. Wong, D. J. Harrison, V. N. Murthy, B. L. Sabatini, E. S. Boyden, R. E. Campbell, A. E. Cohen, All-optical electrophysiology in mammalian neurons using engineered microbial rhodopsins. *Nat. Methods* **11**, 825–833 (2014). [doi:10.1038/nmeth.3000](https://doi.org/10.1038/nmeth.3000) [Medline](#)
28. N. C. Shaner, G. G. Lambert, A. Chamma, Y. Ni, P. J. Cranfill, M. A. Baird, B. R. Sell, J. R. Allen, R. N. Day, M. Israelsson, M. W. Davidson, J. Wang, A bright monomeric green fluorescent protein derived from *Branchiostoma lanceolatum*. *Nat. Methods* **10**, 407–409 (2013). [doi:10.1038/nmeth.2413](https://doi.org/10.1038/nmeth.2413) [Medline](#)
29. B. T. Bajar, E. S. Wang, A. J. Lam, B. B. Kim, C. L. Jacobs, E. S. Howe, M. W. Davidson, M. Z. Lin, J. Chu, Improving brightness and photostability of green and red fluorescent proteins for live cell imaging and FRET reporting. *Sci. Rep.* **6**, 20889 (2016). [doi:10.1038/srep20889](https://doi.org/10.1038/srep20889) [Medline](#)
30. J. Park, C. A. Werley, V. Venkatachalam, J. M. Kralj, S. D. Dib-Hajj, S. G. Waxman, A. E. Cohen, Screening fluorescent voltage indicators with spontaneously spiking HEK cells. *PLOS ONE* **8**, e85221 (2013). [doi:10.1371/journal.pone.0085221](https://doi.org/10.1371/journal.pone.0085221) [Medline](#)
31. H. Zhang, E. Reichert, A. E. Cohen, Optical electrophysiology for probing function and pharmacology of voltage-gated ion channels. *eLife* **5**, e15202 (2016). [doi:10.7554/eLife.15202](https://doi.org/10.7554/eLife.15202) [Medline](#)
32. L. Stryer, Fluorescence energy transfer as a spectroscopic ruler. *Annu. Rev. Biochem.* **47**, 819–846 (1978). [doi:10.1146/annurev.bi.47.070178.004131](https://doi.org/10.1146/annurev.bi.47.070178.004131) [Medline](#)
33. T. Kikukawa, K. Shimono, J. Tamogami, S. Miyauchi, S. Y. Kim, T. Kimura-Someya, M. Shirouzu, K.-H. Jung, S. Yokoyama, N. Kamo, Photochemistry of *Acetabularia*



- rhodopsin II from a marine plant, *Acetabularia acetabulum*. *Biochemistry* **50**, 8888–8898 (2011). [doi:10.1021/bi2009932](https://doi.org/10.1021/bi2009932) [Medline](#)
34. T. Wada, K. Shimono, T. Kikukawa, M. Hato, N. Shinya, S. Y. Kim, T. Kimura-Someya, M. Shirouzu, J. Tamogami, S. Miyauchi, K.-H. Jung, N. Kamo, S. Yokoyama, Crystal structure of the eukaryotic light-driven proton-pumping rhodopsin, *Acetabularia* rhodopsin II, from marine alga. *J. Mol. Biol.* **411**, 986–998 (2011). [doi:10.1016/j.jmb.2011.06.028](https://doi.org/10.1016/j.jmb.2011.06.028) [Medline](#)
35. D. Maclaurin, V. Venkatachalam, H. Lee, A. E. Cohen, Mechanism of voltage-sensitive fluorescence in a microbial rhodopsin. *Proc. Natl. Acad. Sci. U.S.A.* **110**, 5939–5944 (2013). [doi:10.1073/pnas.1215595110](https://doi.org/10.1073/pnas.1215595110) [Medline](#)
36. L. Zimányi, G. Váró, M. Chang, B. Ni, R. Needleman, J. K. Lanyi, Pathways of proton release in the bacteriorhodopsin photocycle. *Biochemistry* **31**, 8535–8543 (1992). [doi:10.1021/bi00151a022](https://doi.org/10.1021/bi00151a022) [Medline](#)
37. J. Platisa, G. Vasan, A. Yang, V. A. Pieribone, Directed evolution of key residues in fluorescent protein inverses the polarity of voltage sensitivity in the genetically encoded indicator ArcLight. *ACS Chem. Neurosci.* **8**, 513–523 (2017). [doi:10.1021/acchemneuro.6b00234](https://doi.org/10.1021/acchemneuro.6b00234) [Medline](#)
38. B. A. Wilt, J. E. Fitzgerald, M. J. Schnitzer, Photon shot noise limits on optical detection of neuronal spikes and estimation of spike timing. *Biophys. J.* **104**, 51–62 (2013). [doi:10.1016/j.bpj.2012.07.058](https://doi.org/10.1016/j.bpj.2012.07.058) [Medline](#)
39. M. E. Garrett, I. Nauhaus, J. H. Marshel, E. M. Callaway, Topography and areal organization of mouse visual cortex. *J. Neurosci.* **34**, 12587–12600 (2014). [doi:10.1523/JNEUROSCI.1124-14.2014](https://doi.org/10.1523/JNEUROSCI.1124-14.2014) [Medline](#)
40. H. Taniguchi, M. He, P. Wu, S. Kim, R. Paik, K. Sugino, D. Kvitsiani, Y. Fu, J. Lu, Y. Lin, G. Miyoshi, Y. Shima, G. Fishell, S. B. Nelson, Z. J. Huang, A resource of Cre driver lines for genetic targeting of GABAergic neurons in cerebral cortex. *Neuron* **71**, 995–1013 (2011). [doi:10.1016/j.neuron.2011.07.026](https://doi.org/10.1016/j.neuron.2011.07.026) [Medline](#)
41. B. Tasic, V. Menon, T. N. Nguyen, T. K. Kim, T. Jarsky, Z. Yao, B. Levi, L. T. Gray, S. A. Sorensen, T. Dolbeare, D. Bertagnolli, J. Goldy, N. Shapovalova, S. Parry, C. Lee, K. Smith, A. Bernard, L. Madisen, S. M. Sunkin, M. Hawrylycz, C. Koch, H. Zeng, Adult mouse cortical cell taxonomy revealed by single cell transcriptomics. *Nat. Neurosci.* **19**, 335–346 (2016). [doi:10.1038/nn.4216](https://doi.org/10.1038/nn.4216) [Medline](#)
42. J. Zhuang, L. Ng, D. Williams, M. Valley, Y. Li, M. Garrett, J. Waters, An extended retinotopic map of mouse cortex. *eLife* **6**, e18372 (2017). [doi:10.7554/eLife.18372](https://doi.org/10.7554/eLife.18372) [Medline](#)
43. S. T. Lim, D. E. Antonucci, R. H. Scannevin, J. S. Trimmer, A novel targeting signal for proximal clustering of the Kv2.1 K<sup>+</sup> channel in hippocampal neurons. *Neuron* **25**, 385–397 (2000). [doi:10.1016/S0896-6273\(00\)80902-2](https://doi.org/10.1016/S0896-6273(00)80902-2) [Medline](#)
44. C. Cai, J. Friedrich, A. Singh, M. H. Eybposh, E. A. Pnevmatikakis, K. Podgorski, A. Giovannucci, VolPy: Automated and scalable analysis pipelines for voltage imaging

- datasets. *PLOS Comput. Biol.* **17**, e1008806 (2021). [doi:10.1371/journal.pcbi.1008806](https://doi.org/10.1371/journal.pcbi.1008806) [Medline](#)
45. H. Inan, M. A. Erdogdu, M. J. Schnitzer, “Robust estimation of neural signals in calcium imaging” in *NIPS’17: Proceedings of the 31st International Conference on Neural Information Processing Systems*, U. von Luxburg, I. Guyon, S. Bengio, H. Wallach, R. Fergus, S. V. N. Vishwanathan, R. Garnett, Eds. (Curran Associates Inc., 2017).
46. H. Inan, C. Schmuckermair, T. Tasci, B. O. Ahanonu, O. Hernandez, J. Lecoq, F. Dinç, M. J. Wagner, M. A. Erdogdu, M. J. Schnitzer, Fast and statistically robust cell extraction from large-scale neural calcium imaging datasets. bioRxiv 2021.2003.2024.436279 [Preprint] (2021); <https://doi.org/10.1101/2021.03.24.436279>.
47. E. Abs, R. B. Poorthuis, D. Apelblat, K. Muhammad, M. B. Pardi, L. Enke, D. Kushinsky, D.-L. Pu, M. F. Eizinger, K.-K. Conzelmann, I. Spiegel, J. J. Letzkus, Learning-related plasticity in dendrite-targeting layer 1 interneurons. *Neuron* **100**, 684–699.e6 (2018). [doi:10.1016/j.neuron.2018.09.001](https://doi.org/10.1016/j.neuron.2018.09.001) [Medline](#)
48. K. Cohen-Kashi Malina, E. Tsivourakis, D. Kushinsky, D. Apelblat, S. Shtiglitz, E. Zohar, M. Sokoletsky, G. Tasaka, A. Mizrahi, I. Lampl, I. Spiegel, NDNF interneurons in layer 1 gain-modulate whole cortical columns according to an animal’s behavioral state. *Neuron* **109**, 2150–2164.e5 (2021). [doi:10.1016/j.neuron.2021.05.001](https://doi.org/10.1016/j.neuron.2021.05.001) [Medline](#)
49. M. He, J. Tucciarone, S. Lee, M. J. Nigro, Y. Kim, J. M. Levine, S. M. Kelly, I. Krugikov, P. Wu, Y. Chen, L. Gong, Y. Hou, P. Osten, B. Rudy, Z. J. Huang, Strategies and tools for combinatorial targeting of GABAergic neurons in mouse cerebral cortex. *Neuron* **92**, 555 (2016). [doi:10.1016/j.neuron.2016.10.009](https://doi.org/10.1016/j.neuron.2016.10.009) [Medline](#)
50. H. Adesnik, W. Bruns, H. Taniguchi, Z. J. Huang, M. Scanziani, A neural circuit for spatial summation in visual cortex. *Nature* **490**, 226–231 (2012). [doi:10.1038/nature11526](https://doi.org/10.1038/nature11526) [Medline](#)
51. L. Mesik, W. P. Ma, L. Y. Li, L. A. Ibrahim, Z. J. Huang, L. I. Zhang, H. W. Tao, Functional response properties of VIP-expressing inhibitory neurons in mouse visual and auditory cortex. *Front. Neural Circuits* **9**, 22 (2015). [doi:10.3389/fncir.2015.00022](https://doi.org/10.3389/fncir.2015.00022) [Medline](#)
52. J. Yu, H. Hu, A. Agmon, K. Svoboda, Recruitment of GABAergic interneurons in the barrel cortex during active tactile behavior. *Neuron* **104**, 412–427.e4 (2019). [doi:10.1016/j.neuron.2019.07.027](https://doi.org/10.1016/j.neuron.2019.07.027) [Medline](#)
53. M. Vinck, R. Batista-Brito, U. Knoblich, J. A. Cardin, Arousal and locomotion make distinct contributions to cortical activity patterns and visual encoding. *Neuron* **86**, 740–754 (2015). [doi:10.1016/j.neuron.2015.03.028](https://doi.org/10.1016/j.neuron.2015.03.028) [Medline](#)
54. J. Reimer, E. Froudarakis, C. R. Cadwell, D. Yatsenko, G. H. Denfield, A. S. Tolias, Pupil fluctuations track fast switching of cortical states during quiet wakefulness. *Neuron* **84**, 355–362 (2014). [doi:10.1016/j.neuron.2014.09.033](https://doi.org/10.1016/j.neuron.2014.09.033) [Medline](#)
55. C. K. Pfeffer, M. Xue, M. He, Z. J. Huang, M. Scanziani, Inhibition of inhibition in visual cortex: The logic of connections between molecularly distinct interneurons. *Nat. Neurosci.* **16**, 1068–1076 (2013). [doi:10.1038/nn.3446](https://doi.org/10.1038/nn.3446) [Medline](#)

56. U. Knoblich, L. Huang, H. Zeng, L. Li, Neuronal cell-subtype specificity of neural synchronization in mouse primary visual cortex. *Nat. Commun.* **10**, 2533 (2019). [doi:10.1038/s41467-019-10498-1](https://doi.org/10.1038/s41467-019-10498-1) [Medline](#)
57. L. Cossell, M. F. Iacaruso, D. R. Muir, R. Houlton, E. N. Sader, H. Ko, S. B. Hofer, T. D. Mrsic-Flogel, Functional organization of excitatory synaptic strength in primary visual cortex. *Nature* **518**, 399–403 (2015). [doi:10.1038/nature14182](https://doi.org/10.1038/nature14182) [Medline](#)
58. J. Akerboom, N. Carreras Calderón, L. Tian, S. Wabnig, M. Prigge, J. Tolö, A. Gordus, M. B. Orger, K. E. Severi, J. J. Macklin, R. Patel, S. R. Pulver, T. J. Wardill, E. Fischer, C. Schüller, T.-W. Chen, K. S. Sarkisyan, J. S. Marvin, C. I. Bargmann, D. S. Kim, S. Kügler, L. Lagnado, P. Hegemann, A. Gottschalk, E. R. Schreiter, L. L. Looger, Genetically encoded calcium indicators for multi-color neural activity imaging and combination with optogenetics. *Front. Mol. Neurosci.* **6**, 2 (2013). [doi:10.3389/fnmol.2013.00002](https://doi.org/10.3389/fnmol.2013.00002) [Medline](#)
59. H. Dana, B. Mohar, Y. Sun, S. Narayan, A. Gordus, J. P. Hasseman, G. Tsegaye, G. T. Holt, A. Hu, D. Walpita, R. Patel, J. J. Macklin, C. I. Bargmann, M. B. Ahrens, E. R. Schreiter, V. Jayaraman, L. L. Looger, K. Svoboda, D. S. Kim, Sensitive red protein calcium indicators for imaging neural activity. *eLife* **5**, e12727 (2016). [doi:10.7554/eLife.12727](https://doi.org/10.7554/eLife.12727) [Medline](#)
60. M. Inoue, A. Takeuchi, S. Horigane, M. Ohkura, K. Gengyo-Ando, H. Fujii, S. Kamijo, S. Takemoto-Kimura, M. Kano, J. Nakai, K. Kitamura, H. Bito, Rational design of a high-affinity, fast, red calcium indicator R-CaMP2. *Nat. Methods* **12**, 64–70 (2015). [doi:10.1038/nmeth.3185](https://doi.org/10.1038/nmeth.3185) [Medline](#)
61. M. Inoue, A. Takeuchi, S. Manita, S. I. Horigane, M. Sakamoto, R. Kawakami, K. Yamaguchi, K. Otomo, H. Yokoyama, R. Kim, T. Yokoyama, S. Takemoto-Kimura, M. Abe, M. Okamura, Y. Kondo, S. Quirin, C. Ramakrishnan, T. Imamura, K. Sakimura, T. Nemoto, M. Kano, H. Fujii, K. Deisseroth, K. Kitamura, H. Bito, Rational engineering of XCaMPs, a multicolor GECI suite for in vivo imaging of complex brain circuit dynamics. *Cell* **177**, 1346–1360.e24 (2019). [doi:10.1016/j.cell.2019.04.007](https://doi.org/10.1016/j.cell.2019.04.007) [Medline](#)
62. M. M. Karnani, J. Jackson, I. Ayzenshtat, A. Hamzehei Sichani, K. Manoocheri, S. Kim, R. Yuste, Opening holes in the blanket of inhibition: Localized lateral disinhibition by VIP interneurons. *J. Neurosci.* **36**, 3471–3480 (2016). [doi:10.1523/JNEUROSCI.3646-15.2016](https://doi.org/10.1523/JNEUROSCI.3646-15.2016) [Medline](#)
63. W. Akemann, H. Mutoh, A. Perron, Y. K. Park, Y. Iwamoto, T. Knöpfel, Imaging neural circuit dynamics with a voltage-sensitive fluorescent protein. *J. Neurophysiol.* **108**, 2323–2337 (2012). [doi:10.1152/jn.00452.2012](https://doi.org/10.1152/jn.00452.2012) [Medline](#)
64. F. Li, J. W. Lindsey, E. C. Marin, N. Otto, M. Dreher, G. Dempsey, I. Stark, A. S. Bates, M. W. Pleijzier, P. Schlegel, A. Nern, S. Y. Takemura, N. Eckstein, T. Yang, A. Francis, A. Braun, R. Parekh, M. Costa, L. K. Scheffer, Y. Aso, G. S. X. E. Jefferis, L. F. Abbott, A. Litwin-Kumar, S. Waddell, G. M. Rubin, The connectome of the adult *Drosophila* mushroom body provides insights into function. *eLife* **9**, e62576 (2020). [doi:10.7554/eLife.62576](https://doi.org/10.7554/eLife.62576) [Medline](#)

65. J. Jackson, I. Ayzenshtat, M. M. Karnani, R. Yuste, VIP+ interneurons control neocortical activity across brain states. *J. Neurophysiol.* **115**, 3008–3017 (2016). [doi:10.1152/jn.01124.2015](https://doi.org/10.1152/jn.01124.2015) [Medline](#)
66. J. Reimer, M. J. McGinley, Y. Liu, C. Rodenkirch, Q. Wang, D. A. McCormick, A. S. Tolias, Pupil fluctuations track rapid changes in adrenergic and cholinergic activity in cortex. *Nat. Commun.* **7**, 13289 (2016). [doi:10.1038/ncomms13289](https://doi.org/10.1038/ncomms13289) [Medline](#)
67. J. M. P. Pakan, S. C. Lowe, E. Dylida, S. W. Keemink, S. P. Currie, C. A. Coutts, N. L. Rochefort, Behavioral-state modulation of inhibition is context-dependent and cell type specific in mouse visual cortex. *eLife* **5**, e14985 (2016). [doi:10.7554/eLife.14985](https://doi.org/10.7554/eLife.14985) [Medline](#)
68. S. Xiao, H. A. Tseng, H. Gritton, X. Han, J. Mertz, Video-rate volumetric neuronal imaging using 3D targeted illumination. *Sci. Rep.* **8**, 7921 (2018). [doi:10.1038/s41598-018-26240-8](https://doi.org/10.1038/s41598-018-26240-8) [Medline](#)
69. M. L. Andermann, N. B. Gilfoy, G. J. Goldey, R. N. S. Sachdev, M. Wölfel, D. A. McCormick, R. C. Reid, M. J. Levene, Chronic cellular imaging of entire cortical columns in awake mice using microprisms. *Neuron* **80**, 900–913 (2013). [doi:10.1016/j.neuron.2013.07.052](https://doi.org/10.1016/j.neuron.2013.07.052) [Medline](#)
70. J. C. Jung, A. D. Mehta, E. Aksay, R. Stepnoski, M. J. Schnitzer, In vivo mammalian brain imaging using one- and two-photon fluorescence microendoscopy. *J. Neurophysiol.* **92**, 3121–3133 (2004). [doi:10.1152/jn.00234.2004](https://doi.org/10.1152/jn.00234.2004) [Medline](#)
71. R. P. Barretto, B. Messerschmidt, M. J. Schnitzer, In vivo fluorescence imaging with high-resolution microlenses. *Nat. Methods* **6**, 511–512 (2009). [doi:10.1038/nmeth.1339](https://doi.org/10.1038/nmeth.1339) [Medline](#)
72. R. P. Barretto, M. J. Schnitzer, In vivo optical microendoscopy for imaging cells lying deep within live tissue. *Cold Spring Harb. Protoc.* **2012**, 1029–1034 (2012). [doi:10.1101/pdb.top071464](https://doi.org/10.1101/pdb.top071464) [Medline](#)
73. Allen Institute for Brain Science, Cell types: Overview of the data, Allen cell types database; <https://celltypes.brain-map.org/>.
74. G. Buzsáki, C. A. Anastassiou, C. Koch, The origin of extracellular fields and currents—EEG, ECoG, LFP and spikes. *Nat. Rev. Neurosci.* **13**, 407–420 (2012). [doi:10.1038/nrn3241](https://doi.org/10.1038/nrn3241) [Medline](#)
75. I. Soltesz, A. Losonczy, CA1 pyramidal cell diversity enabling parallel information processing in the hippocampus. *Nat. Neurosci.* **21**, 484–493 (2018). [doi:10.1038/s41593-018-0118-0](https://doi.org/10.1038/s41593-018-0118-0) [Medline](#)
76. L. Jin, Z. Han, J. Platasa, J. R. A. Wooldorton, L. B. Cohen, V. A. Pieribone, Single action potentials and subthreshold electrical events imaged in neurons with a fluorescent protein voltage probe. *Neuron* **75**, 779–785 (2012). [doi:10.1016/j.neuron.2012.06.040](https://doi.org/10.1016/j.neuron.2012.06.040) [Medline](#)
77. C. Huang, J. R. Maxey, S. Sinha, J. Savall, Y. Gong, M. J. Schnitzer, Long-term optical brain imaging in live adult fruit flies. *Nat. Commun.* **9**, 872 (2018). [doi:10.1038/s41467-018-02873-1](https://doi.org/10.1038/s41467-018-02873-1) [Medline](#)

78. G. J. Goldey, D. K. Roumis, L. L. Glickfeld, A. M. Kerlin, R. C. Reid, V. Bonin, D. P. Schafer, M. L. Andermann, Removable cranial windows for long-term imaging in awake mice. *Nat. Protoc.* **9**, 2515–2538 (2014). [doi:10.1038/nprot.2014.165](https://doi.org/10.1038/nprot.2014.165) [Medline](#)
79. P. Thévenaz, U. E. Ruttimann, M. Unser, A pyramid approach to subpixel registration based on intensity. *IEEE Trans. Image Process.* **7**, 27–41 (1998). [doi:10.1109/83.650848](https://doi.org/10.1109/83.650848) [Medline](#)
80. E. A. Pnevmatikakis, A. Giovannucci, NoRMCorre: An online algorithm for piecewise rigid motion correction of calcium imaging data. *J. Neurosci. Methods* **291**, 83–94 (2017). [doi:10.1016/j.jneumeth.2017.07.031](https://doi.org/10.1016/j.jneumeth.2017.07.031) [Medline](#)
81. K. He, G. Gkioxari, P. Dollar, R. Girshick, Mask R-CNN. *IEEE Trans. Pattern Anal. Mach. Intell.* **42**, 386–397 (2020). [doi:10.1109/TPAMI.2018.2844175](https://doi.org/10.1109/TPAMI.2018.2844175) [Medline](#)
82. F. Franke, R. Quiñero, A. Hierlemann, K. Obermayer, Bayes optimal template matching for spike sorting - combining fisher discriminant analysis with optimal filtering. *J. Comput. Neurosci.* **38**, 439–459 (2015). [doi:10.1007/s10827-015-0547-7](https://doi.org/10.1007/s10827-015-0547-7) [Medline](#)
83. E. A. Pnevmatikakis, D. Soudry, Y. Gao, T. A. Machado, J. Merel, D. Pfau, T. Reardon, Y. Mu, C. Lacefield, W. Yang, M. Ahrens, R. Bruno, T. M. Jessell, D. S. Peterka, R. Yuste, L. Paninski, Simultaneous denoising, deconvolution, and demixing of calcium imaging data. *Neuron* **89**, 285–299 (2016). [doi:10.1016/j.neuron.2015.11.037](https://doi.org/10.1016/j.neuron.2015.11.037) [Medline](#)
84. E. A. Mukamel, A. Nimmerjahn, M. J. Schnitzer, Automated analysis of cellular signals from large-scale calcium imaging data. *Neuron* **63**, 747–760 (2009). [doi:10.1016/j.neuron.2009.08.009](https://doi.org/10.1016/j.neuron.2009.08.009) [Medline](#)
85. T. Deneux, A. Kaszas, G. Szalay, G. Katona, T. Lakner, A. Grinvald, B. Rózsa, I. Vanzetta, Accurate spike estimation from noisy calcium signals for ultrafast three-dimensional imaging of large neuronal populations in vivo. *Nat. Commun.* **7**, 12190 (2016). [doi:10.1038/ncomms12190](https://doi.org/10.1038/ncomms12190) [Medline](#)
86. M. Kannan, G. Vasan, S. Haziza, C. Huang, R. Chrapkiewicz, J. Luo, J. A. Cardin, M. J. Schnitzer, V. A. Pieribone, Dual-polarity voltage imaging of the concurrent activation dynamics of multiple neuron types. Zenodo (2022); <https://doi.org/10.5281/zenodo.6361012>.
87. H. Tian, H. C. Davis, J. D. Wong-Campos, L. Z. Fan, B. Gmeiner, S. Begum, C. A. Werley, G. B. Borja, H. Upadhyay, H. Shah, J. Jacques, P. Park, Y. Qi, V. Parot, K. Deisseroth, A. E. Cohen, All-optical electrophysiology with improved genetically encoded voltage indicators reveals interneuron network dynamics in vivo. bioRxiv 2021.11.22.469481 [Preprint] 2021; <https://doi.org/10.1101/2021.11.22.469481>.
88. S. W. Evans, D. Shi, M. Chavarha, M. H. Plitt, J. Taxidis, B. Madruga, S. C. van Keulen, M. M. Pang, S. Su, F.-J. Hwang, G. Zhang, A. Reese, L. Pradhan, J. L. Fan, S. Lee, Y. Liu, C.-M. Suomivuori, D. Jiang, A. Negrean, S. Wang, N. Ji, T. R. Clandinin, R. O. Dror, G. Bi, C. D. Makinson, P. Golshani, L. M. Giocomo, A. Losonczy, J. B. Ding, M. Z. Lin, A positively tuned voltage indicator reveals electrical correlates of calcium activity in the brain. bioRxiv 2021.10.21.465345 [Preprint] 2021; <https://doi.org/10.1101/2021.10.21.465345>.
